1 **Extrachromosomal DNA is associated with chromothripsis events and diverse**  
2 **prognoses in gastric cardia adenocarcinoma**

3  
4  
5 **Authors:** Xue-Ke Zhao<sup>1,3</sup>, Pengwei Xing<sup>2,3</sup>, Xin Song<sup>1,3</sup>, Miao Zhao<sup>2</sup>, Linxuan Zhao<sup>2</sup>,  
6 Yonglong Dang<sup>2</sup>, Ling-Ling Lei<sup>1</sup>, Rui-Hua Xu<sup>1</sup>, Wen-Li Han<sup>1</sup>, Pan-Pan Wang<sup>1</sup>, Miao-  
7 Miao Yang<sup>1</sup>, Jing-Feng Hu<sup>1</sup>, Kan Zhong<sup>1</sup>, Fu-You Zhou<sup>1</sup>, Xue-Na Han<sup>1</sup>, Chao-Long  
8 Meng<sup>1</sup>, Jia-Jia Ji<sup>1</sup>, Xingqi Chen<sup>2,4\*</sup>, Li-Dong Wang<sup>1,4\*</sup>

9  
10  
11 **Affiliations:**

12 <sup>1</sup> State Key Laboratory of Esophageal Cancer Prevention & Treatment and Henan Key  
13 Laboratory for Esophageal Cancer Research of The First Affiliated Hospital, Zhengzhou  
14 University, Zhengzhou, Henan Province, 450052, PR China

15  
16 <sup>2</sup> Department of Immunology, Genetics and Pathology, Uppsala University, 75108,  
17 Uppsala, Sweden

18  
19  
20 <sup>3</sup> Contributed equally

21  
22 <sup>4</sup> Lead author

23 \* Correspondence to: L.D.W, [ldwang2007@126.com](mailto:ldwang2007@126.com) or X.C, [xingqi.chen@igp.uu.se](mailto:xingqi.chen@igp.uu.se)  
24

25 **Abstract:**

26 Extrachromosomal DNA plays an important role in oncogene amplification in tumour cells and  
27 poor outcomes across multiple cancers. However, the function of extrachromosomal DNA in  
28 gastric cardia adenocarcinoma (GCA) is very limited. Here, we investigated the availability and  
29 function of extrachromosomal DNA in GCA from a Chinese cohort of GCA using whole-  
30 genome sequencing (WGS), whole-exome sequencing (WES), and immunohistochemistry.  
31 For the first time, we identified the ecDNA amplicons present in most GCA patients, and found  
32 that some oncogenes are present as ecDNA amplicons in these patients. We found that  
33 oncogene ecDNA amplicons in the GCA cohort were associated with the chromothripsis  
34 process and may be induced by accumulated DNA damage due to local dietary habits in the  
35 geographic region. Strikingly, we observed diverse correlations between the presence of  
36 ecDNA oncogene amplicons and prognosis, where *ERBB2* ecDNA amplicons correlated with  
37 good prognosis, *EGFR* ecDNA amplicons correlated with poor prognosis, and *CCNE1* ecDNA

38 amplicons did not correlate with prognosis. Large-scale ERBB2 immunohistochemistry results  
39 from 1668 GCA patients revealed that there was a positive correlation between the presence  
40 of ERBB2 and prognosis in 2-7-year survival; however, there was a negative correlation  
41 between the presence of ERBB2 and prognosis in 0-2-year survival. Our observations indicate  
42 that the presence of *ERBB2* ecDNA in GCA patients may represent a good prognosis marker.

43

44

## 45 **Introduction**

46 Extrachromosomal DNA (ecDNA) was first identified more than half a century ago<sup>1</sup>, and has  
47 been associated with genomic instability<sup>2,3</sup>. With next-generation sequencing technologies and  
48 high throughput imaging platforms, an increasing number of studies have shown that ecDNAs  
49 are present in most tissues, and contribute to the intratumoral heterogeneity and cancer  
50 progression<sup>2,4-8</sup>. Using computational analysis of whole-genome sequencing (WGS) data from  
51 a large-scale cancer cohort, it has been demonstrated that the presence of ecDNA is cancer-  
52 type specific, and is associated with oncogene amplification and poor outcomes across  
53 multiple cancers<sup>7</sup>.

54

55 The cardia is located between the esophagus and the stomach. Gastric cardia  
56 adenocarcinoma (GCA) and esophageal squamous cell carcinoma (ESCC) occur together in  
57 the Taihang Mountains of north central China at high rates<sup>9-11</sup>. Gastric cancer in this area  
58 occurs primarily in the uppermost portion of the stomach and is referred to as GCA, and those  
59 in the remainder of the stomach are called gastric noncardia adenocarcinoma (GNCA)<sup>12</sup>.  
60 Adenocarcinomas from junction of esophagogastric junction are usually classified as Siewert  
61 type II of esophagogastric junction adenocarcinoma in western countries<sup>13-17</sup>, where Barrett's  
62 esophagus is very common and has been considered as an important precancerous lesion of  
63 adenocarcinoma at esophagogastric junction<sup>18</sup>. However, GCA from a Chinese population in  
64 this area has distinct features compared to Western countries<sup>11,18,19</sup>, and very low frequency  
65 of Barrett's esophagus is observed<sup>18</sup>. Instead, GCA in this area shares similar features with  
66 that of esophageal squamous cell carcinoma<sup>11,18</sup>. A previous study reported that oncogene  
67 amplification and gene rearrangements drive the progression and poor prognosis of GCA<sup>20</sup>.  
68 However, it is still unclear whether ecDNA is present in GCA, and what role it plays in the GCA  
69 progression or whether it is correlated with patient prognosis. Therefore, we investigated the  
70 availability and function of ecDNA in GCA in a Chinese cohort of GCA using whole-genome  
71 sequencing (WGS), whole-exome sequencing (WES), and immunohistochemistry, and  
72 explored the relationship between the presence of oncogene ecDNA amplicons and prognosis  
73 in GCA.

74

75 **Results**

76 **Characterization of ecDNA amplicons in GCA**

77 Since ecDNA can be identified from WGS data using amplification region reconstruction tool,  
78 AmpliconArchitect (AA)<sup>2,4-7,21</sup>, we first performed WGS of 36 pairs of GCA tumour and tumour-  
79 adjacent normal tissue from a high incidence GCA rate region in the northern region of China,  
80 Henan Province (see **Methods**). All of our WGS data in 36 pairs of samples had sufficient  
81 sequencing coverage and a high mapping rate (>95% mapping rate) (**Supplementary Fig. 1a**,  
82 **Supplementary Table 1**). In addition, we performed single-nucleotide variant (SNV) analysis  
83 in the 36 GCA patients and found that the top ranking mutated gene (81% mutation rate) was  
84 TP53 (**Supplementary Fig. 1b**), which agrees with previous gene mutation studies in GCA  
85 patients<sup>12,18,20,22</sup>. Then, we applied AA to these 36 pairs of whole genome sequencing (WGS)  
86 data pertaining to GCA tumor and tumor-adjacent normal tissue (**Fig. 1a**). Following the AA  
87 pipeline, we treated the tumour-adjacent normal tissue as the background to call the somatic  
88 copy number alteration(CNA) and identified ecDNA amplicons in our GCA cohort. Using this  
89 strategy, ecDNA amplicons were identified in 28 of 36 GCA patients(**Fig. 1b**), and the  
90 frequency (77.8%) of ecDNA amplicons observed in our GCA cohort is similar to that of  
91 esophageal cancer (~80%) but higher than that of gastric cancer (~50%) in a previous report<sup>7</sup>.  
92 Moreover, the number of ecDNAs identified from individual patients showed the high  
93 heterogeneity across the GCA cohort (**Fig. 1b**), with a range of ecDNA amplicons from 0 to 24.  
94 For most patients, the number of ecDNA amplicons was less than 10, and only five patients  
95 had more than 10 ecDNA amplicons (**Fig. 1b**). In our GCA cohort, ecDNA amplicons were  
96 further classified into five categories<sup>7</sup> (**Fig. 1b, Supplementary Fig. 1c-e, Supplementary**  
97 **Table 2**): Circular (n = 45), Complex (n = 21), Linear (n = 50), breakage-fusion-bridge (BFB)  
98 (n = 4) and Invalid (n = 31), which occurred heterogeneously across the GCA patient cohort  
99 (**Fig. 1b**). We further validated the circular feature of circular ecDNA amplicons identified from  
100 AA software using another in silico method, Circle-finder, which identifies circular DNA from  
101 paired-end high-throughput sequencing data<sup>23-25</sup>. By checking the sequencing read orientation  
102 and junction points of circular ecDNA using Circle-finder, we found that 89.94-100% of circular  
103 ecDNA amplicons identified from AA contained the same junctional reads detected by Circle-  
104 finder (**Supplementary Fig. 1f-h**). The high proportion of overlapping circular ecDNA  
105 amplicons from Circle-finder and AA results convinced us that the ecDNA amplicons identified  
106 with AA are reliable.

107  
108 Next, we analyzed the size of ecDNA amplicons in our GCA cohort. The size of ecDNA  
109 amplicons from GCA ranged from 100 Kbp to 22.6 Mbp, with a median size of 350 Kb  
110 (**Supplementary Fig. 2a**), where 75% of ecDNA amplicons were between 1-2 Mbp, and only  
111 1% of ecDNA amplicons were larger than 20 Mbp (**Supplementary Fig. 2b**). Some large

112 ecDNA amplicons (> 20 Mbp) could be deconvoluted into multiple potential combinations of  
113 amplicons using AA software (**Supplementary Figure 2c**). Since deconvolution is performed  
114 using a computational prediction, there is still the possibility that multiple structures from these  
115 large ecDNA amplicons are independent from circular amplicons. We also investigated the  
116 frequency of ecDNA amplicons in different chromosomes. We found ecDNA amplicons of  
117 different lengths in all chromosomes (**Supplementary Fig. 2d, 2e**) and the number of ecDNA  
118 amplicons in the different chromosomes was independent of the length of the chromosome  
119 (**Supplementary Fig. 2d**). We concluded that ecDNA amplicons occur heterogeneously  
120 across GCA patients (**Fig. 1b, Supplementary Fig. 2e**).

121  
122 Next, we performed genomic annotation for all ecDNA amplicons (**Fig. 1c, Supplementary**  
123 **Fig. 2f, 2h**). We found that ecDNA amplicons occurred in different parts of the genome,  
124 including 2452 sites in protein coding regions and 579 sites in long intergenic non-protein  
125 coding RNA (lincRNA) (**Fig. 1c**). However, the frequency of ecDNA amplicons observed in  
126 coding regions (6.28%) was higher than the proportion of coding regions in the whole genome  
127 (3.48%) (**Supplementary Fig. 2f**). Furthermore, the proportion of ecDNA amplicons detected  
128 in the exons (14.5%) is higher than that of exons in the entire genome (9.2%) (**Supplementary**  
129 **Fig. 2g**). These ecDNA amplicons are also identified at regions of small RNAs (**Fig. 1c**),  
130 including miRNAs (302 sites), SnRNAs (130 sites), SnoRNAs (63 sites), and rRNAs (37 sites).  
131 Interestingly, we found that 82 ecDNA amplicons were from oncogenes and tumor suppressor  
132 genes (TSGs) (**Fig. 1c**). Next, we focused on the analysis of oncogene and TSG ecDNA  
133 amplicons in our GCA cohort (**Fig. 1d**). The oncogene and TSG ecDNA amplicons across the  
134 GCA cohort exhibited a high heterogeneity, and the number of such oncogene and TSG  
135 ecDNA amplicons varied from 1 to 11 (**Fig. 1d, 1e**). Amplification of the cyclin-E1 (*CCNE1*)  
136 in the GCA was observed in a previous report<sup>26</sup>. Specifically, we found that *CCNE1* ecDNA  
137 amplicons occurred in 11 patients in our cohort (**Fig. 1d**). *ERBB2* is a member of the human  
138 epidermal growth factor receptor (*EGF* family), and it has been reported that *ERBB2*  
139 amplification plays an important role in GCA progression<sup>26</sup>. We found that four patients had  
140 *ERBB2* ecDNA amplicons (**Fig. 1d**). The, *CDK12*, *EGFR* and *MYC*, oncogenes and TSGs  
141 were also found in the ecDNA format in more than three patients in the cohort (**Fig. 1d**). The  
142 other name for *ERBB2* is *HER2*, and *EGFR* is also called *HER1* or *ERBB1*<sup>27</sup>. Both *HER1* and  
143 *HER2* are members of the *EGF* family. The identification of *HER1* ecDNA and *HER2* ecDNA  
144 in GCA reflects the role of the *EGF* family in GCA progression<sup>28</sup>. However, we did not observe  
145 codetection of *HER1* ecDNA amplicons and *HER2* ecDNA amplicons in the same GCA patient  
146 (**Fig. 1d**), which likely indicates the heterogeneous features in our GCA cohort. The frequent  
147 detection of ecDNA amplicons in The Cancer Genome Atlas (TCGA) reflects the presence of  
148 cancer specific oncogene ecDNA amplicons in each cancer type<sup>7</sup>, where the ecDNA amplicons

149 from gastric cancer and esophagus cancer are investigated. Since the cardia is located at the  
150 junction of esophageal and stomach, we next investigated whether the list of ecDNA amplicons  
151 from GCA was similar to that of gastric cancer or esophageal cancer using the TCGA report.  
152 We found that GCA shares some common oncogene ecDNA amplicons with both gastric  
153 cancer and esophageal cancer including *CCNE1*, *EGFR*, and *MYC* (**Supplementary Fig. 3**).  
154 The top two ranking ecDNA amplicons, *ERBB2* and *CCNE1*, were the same in both gastric  
155 cancer and GCAs. However, the top ranking list of oncogene ecDNA amplicons was different  
156 between esophageal cancer and GCAs (**Supplementary Fig. 3**), where *CCND1* and *EGFR*  
157 were the top two ranking oncogene amplicons in the esophageal cancer. Our results indicate  
158 that the top oncogene ecDNA amplicons from GCAs is more similar to those from gastric  
159 cancer. In addition, we observed that several oncogenes and TSG ecDNA amplicons appear  
160 in the same GCA patient (**Fig. 1d**). The cyclization of oncogene ecDNA is highly amplified due  
161 to its rolling-circle replication mechanism, and the circular ecDNA could contain different  
162 oncogenes from different regions of the genome<sup>2</sup>. Thus, we examined whether these different  
163 oncogenes and TSGs in the same patient were located in the same ecDNA amplicon. We first  
164 divided the highly amplified regions into segments, recombined them together by read  
165 orientation and read junctions, and further reconstructed circular ecDNA containing multiple  
166 oncogenes and/or TSG ecDNA amplicons (**Fig. 1d-f**, **Supplementary Fig. 4a-d**,  
167 **Supplementary Table 3**). We referred multiple (two or more than two) oncogenes and/or  
168 TSGs in the same ecDNA amplicon as oncogene ecDNA co-amplification (**Fig. 1d**), and  
169 investigated the frequency of such occurrences (**Fig. 1d, 1e**). We found i) co-amplification of  
170 oncogenes occurred in 50% of patients (18 of 36 patients) (**Fig. 1e**, **Supplementary Fig. 4a**);  
171 ii) the frequency of oncogene ecDNA co-amplification varied from 50% to 100% of all  
172 oncogene amplifications in different patients (**Fig. 1e**); and iii) some pairs of oncogene ecDNA  
173 co-amplifications were observed in more than one patient (**Supplementary Table 3**), where  
174 oncogene and TSG ecDNA pairs of *ERBB2* and *CDK12*, *RARA* and *SMARCE1*, and *CBLC*  
175 and *BCL3* occurred in 3 patients; oncogene ecDNA pairs of *EGFR* and *IRF4*, *PPARG* and  
176 *RAF1*; and pairs of *CDK12*, *ERBB2* and *RARA* occurred in 2 patients. Interestingly, *EGFR* and  
177 *CDK6* with a physical distance of 40 Mbp, are located in the same circular ecDNA (**Fig. 1f**).  
178 Using the normal genome copy number as the background, we found that the *EGFR* and *CDK6*  
179 circular ecDNAs were amplified forty times compared to other parts of the genome (**Fig. 1f**).  
180 The coamplification of *EGFR* and *CDK6* in the same ecDNA amplicons indicates that different  
181 genes could work together during the progression of GCAs.

182

### 183 **Validation of ecDNA amplicons using Circle-Seq**

184 To further evaluate the accuracy of ecDNA amplicon prediction from the AmpliconArchitect  
185 prediction, we chose 10 pairs of GCAs from our cohort to perform ecDNA sequencing with

186 Circle-seq<sup>29</sup> ( See **Methods, Supplementary Fig. 5a**). We performed ecDNA peak calling from  
187 Circle-seq using adjacent normal tissue as the control<sup>30</sup>. Among 10 pairs of these selected  
188 GCA patients for Circle-Seq, seven of them were ecDNA amplicon positive by WGS prediction  
189 (**Fig. 1b**), and ecDNA amplicons (ranging from 491 to 39020) were identified in all of them  
190 using Circle-Seq (**Supplementary Fig. 5b**). Then, we checked the overlapping ecDNA  
191 segments from Circle-seq and predicated ecDNA amplicons from the WGS in the seven pairs  
192 of GCAs. We found that most ecDNA amplicons identified in the WGS appeared in the Circle-  
193 seq peak, where 100% WGS ecDNA in four GCAs, more than 80% WGS ecDNA in two GCAs,  
194 and 50% WGS ecDNA in one GCA were confirmed by Circle-seq (**Fig. 2a**). Since *CCNE1* was  
195 the most dominant detected ecDNA amplicon across the cohort, we determined the detailed  
196 structure of *CCNE1* in Circle-seq (**Supplementary Fig. 5c**). We found that there was a clear  
197 enrichment of *CCNE1* in two GCAs from both Circle-seq and WGS, and that both had a similar  
198 tendency for amplification (**Supplementary Fig. 5c**). However, there was no *CCNE*  
199 amplification in the normal samples, in either WGS or Circle-seq, indicating that our ecDNA  
200 amplicon detection, identified with AmpliconArchitect prediction from the WGS data, is reliable.  
201 The AA computational tool not only predicted the ecDNA amplicon, but also provided the  
202 structure of the ecDNA amplicon. Upon closer inspection comparing the fine structure of  
203 ecDNA amplification between the WGS and Circle-seq, we found that the fine structure was  
204 not always the same (**Fig. 2b**). The *FGFR2* ecDNA amplicon exhibited highly amplified  
205 segments with fluctuations in WGS prediction but not in the Circle-seq detection (**Fig. 2b**). The  
206 difference in the fine structure from WGS and Circle-seq likely reflects the technical bias of the  
207 ecDNA amplicon prediction from the WGS and library preparation from the Circle-seq.

208

### 209 **EcDNA amplicons in GCA is associated with chromothripsis**

210 Even though ecDNA amplicons are widely detected in different types of cancer, the sources of  
211 ecDNA amplification remain unknown. It has been reported that chromothripsis contributes to  
212 cancer progression and drives ecDNA amplification in cancer<sup>3,31,32</sup>, and that some ecDNA  
213 amplicons are generated during chromothripsis process<sup>2</sup>. Next, we aimed to understand the  
214 relationship between chromothripsis and ecDNA amplicons in our GCA cohort. We used the  
215 ShatterSeek package<sup>33</sup> to identify chromothripsis events across the 36 GCA patients  
216 (**Supplementary Fig. 6a**). Strikingly, we found that chromothripsis occurred in 34 GCA  
217 patients across our cohort (**Supplementary Fig. 6b**). We also divided the chromothripsis  
218 events into fine categories with the parameters of high confidence (HC) and low confidence  
219 (LC) (see **Methods**). This revealed that HC chromothripsis occurred in 61.1% of GCAs across  
220 the cohort, and LC chromothripsis occurred in 88.9% of all GCA samples. We found that the  
221 frequency of chromothripsis in GCA patients was quite diverse across the cohort, where the  
222 range of chromothripsis was from 0 to 4 for HCs and 0 to 14 for LCs (**Supplementary Fig.**

223 **6c**). The location of the chromothripsis events in the genome was also quite heterogeneous  
224 across the cohort (**Fig. 3a**). When we aligned chromothripsis events and ecDNA amplicons  
225 on the genome browser, we observed a clear overlap between ecDNA amplicons and  
226 chromothripsis at some of the oncogene ecDNA loci, including the *ERBB2* and *MYC* genes  
227 (**Fig. 3b, Supplementary Fig. 7**). To further explore the relationship between chromothripsis  
228 and ecDNA amplification, we quantified the number of ecDNA amplicons that overlapped with  
229 chromothripsis (**Fig. 3c**). The results showed that 17.22% of ecDNA amplicons occurred in HC  
230 chromothripsis, and 15.89% occurred in LC chromothripsis. Taken together, these results  
231 indicate that 33.11% of ecDNA amplicons might be caused by chromothripsis (**Fig. 3c**). To  
232 further determine the relationship between ecDNA amplicon and chromothripsis, we calculated  
233 the correlation between the number of chromothripsis events and the total length of all ecDNA  
234 (**Fig. 3d**). The results clearly demonstrated a positive correlation between ecDNA amplicons  
235 and chromothripsis events (Pearson's correlation = 0.42). Our results indicate the ecDNA  
236 amplicons in GCAs are more likely to occur due to chromothripsis, and that such events could  
237 contribute to GCA progression if the chromothripsis event occurs at the oncogene site.

238

239 Comprehensive analysis of chromothripsis using large-scale samples of human cancers from  
240 TCGA showed that the frequency of chromothripsis is greater than 50% in several cancer  
241 types<sup>34</sup>. However, the frequency of chromothripsis in our GCA cohort was 94% (**Fig. 3a**), which  
242 is extremely high. Previous reports have shown that chromothripsis is associated with genomic  
243 instability and DNA damage<sup>35-39</sup>. Thus, we investigated potential risk factors contributing to such  
244 a high frequency of chromothripsis in our GCA cohort by analyzing genome stability and DNA  
245 damage. First, we performed microsatellite instability (MSI) detection by  
246 immunohistochemistry (IHC) staining of four proteins (MLH1, MSH2, MSH6 and PMS2)<sup>40,41</sup>.  
247 We found that only 9 of 36 samples were MSI-high samples (**Supplementary Fig. 8a, 8b,**  
248 **Supplementary Table 4**), and 27 patients were MSI-low. The two chromothripsis-negative  
249 samples were all in the MSI-low group (**Supplementary Fig. 8b**), and there was no correlation  
250 between MSI grade and chromothripsis events (**Supplementary Fig. 8b**,  $p = 1$ , Fisher's exact  
251 test). Thus, we concluded that the high frequency of chromothripsis is not likely due to the high  
252 proportion of MSI-high samples in our cohort. Second, we calculated chromosomal instability  
253 (CIN) for all 36 samples in accordance with a previous report<sup>42</sup> and divided GCA patients into  
254 four groups based on the genome integrity index (from low to high: 0 to 0.2, 0.2 to 0.4, 0.4 to  
255 0.6, 0.6-0.8) (see **Methods**). We found only 2 samples in our GCA patients in the high-grade  
256 CIN group (**Supplementary Fig. 8c, Supplementary Table 4**). The two chromothripsis-  
257 negative samples were in the low-grade CIN group (**Supplementary Fig. 8c**), and there was  
258 no correlation between CIN grade and chromothripsis events (**Supplementary Fig. 8c**,  $p =$   
259 0.381, Fisher's exact test). Thus, we concluded that the high frequency of chromothripsis is

260 not likely due to the high proportion of high-grade CIN in our cohort. Third, we performed IHC  
261 staining of  $\gamma$ H2AX protein, a crucial biomarker for the detection of DNA double strand breaks<sup>43</sup>,  
262 in our GCA cohort. We found that 80.55% (29/36) of GCA patients were  $\gamma$ H2AX protein positive  
263 (**Fig. 3e, 3f, Supplementary Table 4**). The two chromothripsis-negative samples were both  
264  $\gamma$ H2AX protein negative (**Fig. 3f**), and there was a significant correlation between the presence  
265 of  $\gamma$ H2AX and chromothripsis events (**Fig. 3f**,  $p = 0.033$ , Fisher's exact test). We also found  
266 that the total length of chromothripsis in  $\gamma$ H2AX protein-positive patients was significantly  
267 longer than that in  $\gamma$ H2AX protein-negative patients (**Fig. 3g**,  $p = 0.025$ ). Thus, we suspect that  
268 the high frequency of chromothripsis is most likely due to the high degree of DNA damage that  
269 has accumulated in GCA patients. All GCA patients in our study were from the high incidence  
270 area for GCA in Henan Province, northern China<sup>9</sup>, where the intake of nitrosamine-rich foods,  
271 such as pickled vegetables, has been well recognized as one of the key risk factors for GCA<sup>44</sup>.  
272 Accumulating evidence has demonstrated that nitrosamine is a very important factor for DNA  
273 alkylation, synthesis disorder, high instability and even DNA double strand breaks<sup>45-50</sup>. Thus,  
274 we suspected that nitrosamine exposure in our GCA cohort may accumulate DNA damage,  
275 potentially inducing a high frequency of chromothripsis. As ecDNA amplicons in our GCA  
276 cohort are more likely to occur due to chromothripsis, as stated above, and it was also  
277 proposed that chromothripsis is a primary mechanism that accelerates genomic DNA  
278 rearrangement and amplification into ecDNA by a recent study<sup>3</sup>, our data suggest that local  
279 dietary habits from the geographic region in our cohort may contribute to ecDNA occurrence  
280 in GCA patients.

281

### 282 **The presence of oncogene ecDNA does not increase the mutation frequency in GCA**

283 Oncogene amplification is a key factor contributing to human cancer<sup>51</sup>. A high frequency of  
284 oncogene mutations has also been reported in GCA<sup>20,22</sup>. Since both oncogene amplification  
285 (**Fig. 1d**) and oncogene mutations (**Supplementary Fig. 1b**) were observed in our GCA cohort,  
286 we investigated whether there was a high frequency of oncogene mutations in the region of  
287 ecDNA oncogene amplicons. We calculated numbers of SNVs in the whole genome as well  
288 as in only ecDNA amplicon present regions (**Supplementary Fig. 9a**) and found mutation  
289 frequency in the ecDNA amplicon regions occur at a similar level as in the whole genome from  
290 most patients, except for two GCA samples (**Supplementary Fig. 9a**). Statistical analysis  
291 showed that there was no significant difference in mutation frequency between ecDNA  
292 amplicon regions and the whole genome in our GCA cohort (**Supplementary Fig. 9b**,  $p =$   
293  $0.18$ ). We also compared the numbers of SNVs in regions of individual oncogene or TSG  
294 ecDNA regions (same oncogene or TSG ecDNA observed in 2 or more patients) between  
295 present and absent oncogene ecDNA patients (**Supplementary Fig. 9c**) and found that there  
296 were significantly more SNVs in the ecDNA present group only with respect to the BIRC3 gene



297 **(Supplementary Fig. 9c,  $p = 0.031$ )** but not at other oncogenes **(Supplementary Fig. 9c)**.  
298 Thus, we concluded that there may be no relationship between oncogene mutations and the  
299 presence of oncogene ecDNA amplicons in GCA patients.

300

### 301 **The presence of oncogene ecDNA amplicons has the diverse correlation with the** 302 **prognosis of GCA**

303 It was reported that the presence of ecDNA is associated with oncogene amplification and  
304 poor outcomes across multiple cancers<sup>7</sup>. Thus, we investigated the relationship between  
305 oncogene amplification, the presence of ecDNA and patient prognosis in our GCA cohort. We  
306 first explored the relationship between oncogene amplification and GCA patient prognosis by  
307 focusing on the top 11 high frequency of oncogenes and TSGs ecDNA amplicons. We found  
308 that most of the top 11 high frequency oncogene amplifications across the cohort with a copy  
309 number (CN) greater than 5 came from ecDNA amplicons **(Supplementary Fig. 10)**. We  
310 compared the gene copy numbers and patient survival time by splitting the gene amplification  
311 into different groups (High, Low, Normal) **(Supplementary Fig. 10)**. As expected, the survival  
312 time in some GCA patients after surgery was shorter in those with a high copy number of  
313 certain oncogenes, including *EGFR*, *MYC*, and *BIRC3* **(Supplementary Fig. 10)**. Surprisingly,  
314 we found that patients with a low CN amplification of *CCNE1* and *ERBB2* survived for a shorter  
315 period compared to those with a normal gene CN **(Supplementary Fig. 10)**, and patients  
316 survived even longer with a high CN of *CCNE1* and *ERBB2* amplification **(Supplementary Fig.**  
317 **10)**. To further investigate our observation, we performed a correlation study between different  
318 ranges of CN amplification and survival time from the *CCNE1*, *ERBB2*, and *EGFR* genes **(Fig.**  
319 **4a)**. The results indicated that the short survival time was due to the high range of oncogene  
320 amplification in *EGFR*. However, for *ERBB2* and part of the sample of *CCNE1*, the tendency  
321 was completely opposite. Specifically, we found that four samples with a high CN of *CCNE1*,  
322 caused by ecDNA amplicons, exhibited an average survival time of 5.08 years, and all samples  
323 with a high CN of *ERBB2* had an average survival time of 6.59 years **(Fig. 4a)**.

324

325 Furthermore, we focused on investigating the relationship between prognosis and CN of three  
326 oncogenes: *CCNE1*, *ERBB2*, and *EGFR*. *EGFR* followed the tendency that those with high-  
327 range oncogene amplification had a decreased survival time than those with low-range  
328 amplification ( $p = 0.0013$ ) **(Fig. 4b)**. The relationship between *EGFR* copy number and patient  
329 survival time reflects oncogene function in tumorigenesis from GCAs. For both *ERBB2* and  
330 *CCNE1*, we found that patients with low range amplification had the worst prognosis compared  
331 to those with normal and high range amplification**(Fig. 4b)**. To our surprise, patients with high  
332 range amplification from *CCNE1* and *ERBB2* had the best prognosis compared to those with  
333 low and middle range amplification **(Fig. 4b)**. To further confirm the relationship between

334 oncogene amplification and patient survival, we performed the WES sequencing on another  
335 independent GCA cohort with 39 GCA patients together with our 36 GCA patient cohorts  
336 (**Supplementary Fig. 11a, Supplementary Table 5**). First, the copy numbers of *ERBB2* from  
337 WGS in the 36 patients were very similar to the copy numbers detected in the WES data  
338 (**Supplementary Fig. 11b**), which indicates that the WES data could be used to validate our  
339 WGS observation of *ERBB2* gene amplification. Next, we focused on the WES data for 75  
340 GCA patients, and we observed a similar tendency, namely, that the high-range *ERBB2*  
341 amplification was correlated with increased survival time (**Supplementary Fig. 11c,**  
342 **Supplementary Table 6**). Taken together, we concluded that our observation is independent  
343 of the specific GCA cohort. This negative correlation between oncogene amplification and  
344 patient prognosis has previously been reported in many independent studies, including large  
345 group studies in the TCGA<sup>7</sup>. We found a similar tendency for some oncogenes in GCA, such  
346 as *EGFR*. The negative correlation is true for the low range amplification from *ERBB2* and  
347 *CCNE1* (**Fig. 4b**); however, the correlation becomes positive when these two genes undergo  
348 high range amplification (**Fig. 4b**).

349  
350 Next, we investigated the relationship between the presence of oncogene ecDNA amplicons  
351 and patient prognosis by dividing patients into ecDNA present and absent groups (**Fig. 4c**),  
352 and we found diverse correlations of present oncogene ecDNA amplicons and patient  
353 survival. In brief, we found no significant difference in prognosis for the absence and  
354 presence of *CCNE1* ecDNA amplicons (**Fig. 4c**,  $p = 0.55$ ); the presence of *EGFR* ecDNA  
355 amplicons had a negative correlation with patient prognosis (**Fig. 4c**,  $p = 0.036$ ); and the  
356 presence of *ERBB2* ecDNA amplicons had a positive correlation with patient prognosis (**Fig.**  
357 **4c**,  $p = 0.0068$ ). To understand whether our observation was due to clinicopathological  
358 factors from GCA patients, we first investigated the relationship between clinicopathological  
359 phenotypes and prognosis in GCA (**Methods, Supplementary Fig. 12, Supplementary**  
360 **Table 4**). We found that UICC tumour stage was the only clinicopathological factor correlated  
361 with GCA survival (**Supplementary Fig. 12i**). Next, we performed survival analysis using  
362 clinicopathological variables of patients together with the presence of ecDNA amplicons  
363 (*ERBB2*, *EGFR*, *CCNE1*) by dividing patients into those with and without ecDNA amplicons  
364 (**Supplementary Fig. 12**). We found that the presence of *ERBB2* ecDNA amplicons may be  
365 relevant to the UICC tumour stage but not to other clinicopathological variables  
366 (**Supplementary Fig. 12**). However, the presence of *EGFR* and *CCNE1* ecDNA amplicons  
367 was not relevant to any clinicopathological variables (**Supplementary Fig. 12**). Since both  
368 UICC tumour stage (**Supplementary Fig. 12i**) and the presence of *ERBB2* ecDNA (**Fig. 4c**)  
369 are contributing factors to patient survival, we assumed that there might be some connection  
370 between the presence of the *ERBB2* ecDNA amplicon and GCA stage. However, our sample

371 size was too small (36 cases) to obtain further conclusions. It will be very interesting to  
372 perform further studies with larger sample sizes of patients to obtain additional conclusions in  
373 the future.

374

375 The positive correlation between the presence of *ERBB2* ecDNA in GCA and patient  
376 prognosis is paradoxical to large-scale TCGA studies in many cancer types<sup>7</sup>, where the  
377 presence of ecDNA amplicons was shown to be associated with poor outcomes. Since it was  
378 reported that there is a paradoxical relationship between chromosomal instability and survival  
379 outcomes in cancer<sup>42</sup>, we examined whether the positive correlation between the presence of  
380 *ERBB2* ecDNA amplicons and patient prognosis is due to chromosomal instability (CIN) in  
381 our GCA cohort. The survival analysis from the four groups of CIN (**Methods**,  
382 **Supplementary Fig. 8c**) shows that GCA patients with stable chromosomes survived longer  
383 than patients with unstable chromosomes in our cohort (**Supplementary Fig. 13a**). However,  
384 we did not find that *ERBB2* ecDNA amplicons present in samples were only enriched in  
385 specific CIN groups (**Supplementary Fig. 13b**), and we did not observe a significant  
386 difference in CIN values between ecDNA present samples and ecDNA absent samples  
387 (**Supplementary Fig. 13c**,  $p = 0.33$ ). Thus, we concluded that the paradoxical relationship  
388 between the presence of *ERBB2* ecDNA amplicons in GCA patients and survival outcome is  
389 independent of CIN. A recent study showed chromatin structure of ecDNA is highly  
390 accessible<sup>52</sup>, we assumed that the *ERBB2* gene is highly expressed in ecDNA present GCA  
391 patients. It was also reported the amplification of *ERBB2* gene was followed by *ERBB2* gene  
392 overexpression in the same GCA tissue<sup>18,53-55</sup>. At the same time, we observed a positive  
393 correlation between *ERBB2* gene expression and ERBB2 protein expression in GCA patients  
394 ( $n = 44$ ) (**Supplementary Fig. 14a**,  $R = 0.79$ , **Supplementary Table 7**). Thus, we  
395 hypothesized that protein levels of ERBB2 were also high in *ERBB2* ecDNA present  
396 patients, and that a high level of ERBB2 protein would be positively associated with GCA  
397 prognosis. To test our hypothesis, we performed immunohistochemistry of the ERBB2  
398 protein from 1668 GCA patients (with 0- to 7- year survival time after surgery) (see **Methods**,  
399 **Supplementary Fig. 14b**, **Supplementary Table 8**). Although we did not observe a  
400 significant difference in patient prognosis among all patients ( $n = 1668$ , **Supplementary Fig.**  
401 **14c**,  $p = 0.16$ ), there was a significant difference in patient prognosis in patients surviving  
402 between 0-2 years (including 2 years) after surgery ( $n = 750$ , **Fig. 4d**,  $p = 0.016$ ) and in  
403 patients surviving between 2-7 years ( $n = 918$ , **Fig. 4d**,  $p = 0.025$ ). We concluded that there  
404 is a positive correlation between ERBB2 protein presence and patient prognosis in 2-7 year  
405 survival after surgery, and there is a negative correlation between ERBB2 protein presence  
406 and patient prognosis in the 0-2 year survival after surgery. It was reported ERBB2 protein  
407 expression and gene amplification correlate with better survival in esophageal

408 adenocarcinoma<sup>56</sup>, and the positive correlation between the presence of ERBB2 protein and  
409 increased patient survival (2-7 years of survival) in our GCA cohort likely also reflects the  
410 similarity between esophageal adenocarcinoma features and GCA. Since we assumed that  
411 the protein level of ERBB2 is high in *ERBB2* ecDNA-positive patients, our observation  
412 indicates that the *ERBB2* ecDNA amplicon may represent a good prognostic marker in GCA  
413 patients.

414

## 415 **Discussions**

416 In summary, for the first time, we identified ecDNA amplicons in GCA patients using WGS data,  
417 and validated these ecDNA amplicons using Circle-seq. We found that these ecDNA  
418 amplicons are present in most GCA patients, and have exhibit heterogeneity in different GCA  
419 patients. Additionally, for the first time, we found that several oncogenes are in the format of  
420 ecDNA amplicons in GCA patients and that different oncogenes could coamplify in the same  
421 ecDNA amplicon. Interestingly, we found oncogene ecDNA amplicons were associated with  
422 a high frequency of chromothripsis in our GCA cohort, and such a high frequency of  
423 chromothripsis in our cohort is likely due to high degree of DNA damage induced by  
424 nitrosamine exposure from a local diet<sup>45-50</sup>. We propose that local dietary habits from the  
425 geographic region may have contributed to ecDNA occurrence in our GCA cohort. It was  
426 reported that ecDNA is a major mechanism of drug resistance in several tumour types<sup>3</sup>, thus,  
427 it will be valuable to follow clinical annotation on previous exposure therapy together with  
428 ecDNA detection in large-scale samples of GCA patients to design therapy strategies for GCA  
429 patients in the future.

430

431 Strikingly, we found that the correlation between the present oncogene ecDNA amplicons  
432 and patient prognosis was different depending on gene in GCA patients, where *ERBB2*  
433 ecDNA amplicons correlated with good prognosis, *EGFR* ecDNA amplicons correlated with  
434 poor prognosis and *CCNE1* ecDNA amplicons did not correlate with prognosis. The  
435 relationship between presence of ecDNA and prognosis in GCA reported in this study is  
436 different from a previous report indicating that oncogene ecDNA amplicons correlate with  
437 poor prognosis in other cancers from TCGA<sup>7</sup>, and our observation likely reflects the  
438 heterogeneous nature of cancers. These diverse associations of oncogene ecDNA  
439 amplification and prognosis may aid in designing better personal therapy strategies for GCA  
440 patients in the future. Large-scale ERBB2 immunohistochemistry results from 1668 GCA  
441 patients demonstrated that there was a positive correlation between ERBB2 protein  
442 presence and patient prognosis in 2-7-year survival after surgery; however, there was a  
443 negative correlation between ERBB2 protein presence and patient prognosis in 0-2-year  
444 survival after surgery. This paradoxical relationship between ERBB2 protein presence and

445 prognosis is similar to a previous report on the relationship between ERBB2 protein  
446 expression and improved survival in esophageal adenocarcinoma<sup>56</sup>, which likely reflects the  
447 similarity in features between esophageal adenocarcinoma and GCA. Since we assumed  
448 that the protein levels of ERBB2 are high in *ERBB2* ecDNA-positive patients, our observation  
449 indicates that the *ERBB2* ecDNA amplicon may represent a good prognostic marker in GCA  
450 patients.

451

452 **Acknowledgements:** This work is supported by the National Key R&D Program of China  
453 (2016YFC0901403 to L.D.W.), the National natural science foundation of China (81872032,  
454 U1804262 to L.D.W.), the Swedish Research Council (VR-2016-06794, VR-2017-02074 to  
455 X.C.), Beijer Foundation (to X.C.), Jeassons Foundation (to X.C.), Petrus och Augusta  
456 Hedlunds Stiftelse (to X.C.), Göran Gustafsson's prize for younger researchers (to X.C.),  
457 Vleugel Foundation (to X.C.), and Uppsala University (to X.C.).

458

#### 459 **Author contributions**

460 L.D.W and X.C. conceived and designed the study; X.K.Z., X.S., L.L.L., R.H.X., W.L.H., P.P.W.,  
461 and F.Y.Z. contributed to the collection of the patient materials and clinical information; X.K.Z.,  
462 X.S., M.M.Y., J.F.H., and K.Z. prepared the WGS and ecDNA sequencing of GCA; P.X.  
463 performed all the sequencing data mining; L. Z., Y. D., L.L.L., X.N.H., C.L.M., and J.J.J. were  
464 responsible for the protein expressions of ERBB2,  $\gamma$ H2AX, and MSI staining in the GCA and  
465 analysis of the relationship with the GCA survival; M.Z., X.K.Z., P.X., L.D.W., and X.C. wrote  
466 the manuscript together with input from all authors; and L.D.W. and X.C. supervised all aspects  
467 of this work.

468

#### 469 **Competing Financial Interests statements**

470 The authors declare no competing financial interests.

471

#### 472 **Availability of the data**

473 All raw data is deposited in the China National Center for Bioinformation with access number  
474 of HRA00081

475

#### 476 **References**

- 477 1 Hotta, Y. & Bassel, A. Molecular Size and Circularity of DNA in Cells of Mammals and  
478 Higher Plants. *P Natl Acad Sci USA* **53**, 356-&, doi:DOI 10.1073/pnas.53.2.356 (1965).  
479 2 Verhaak, R. G. W., Bafna, V. & Mischel, P. S. Extrachromosomal oncogene amplification  
480 in tumour pathogenesis and evolution. *Nat Rev Cancer* **19**, 283-288,  
481 doi:10.1038/s41568-019-0128-6 (2019).

- 482 3 Shoshani, O. *et al.* Chromothripsis drives the evolution of gene amplification in cancer.  
483 *Nature* **591**, 137-141, doi:10.1038/s41586-020-03064-z (2021).
- 484 4 Koche, R. P. *et al.* Extrachromosomal circular DNA drives oncogenic genome  
485 remodeling in neuroblastoma (vol 52, pg 29, 2019). *Nat Genet* **52**, 464-464,  
486 doi:10.1038/s41588-020-0598-1 (2020).
- 487 5 Turner, K. M. *et al.* Extrachromosomal oncogene amplification drives tumour evolution  
488 and genetic heterogeneity. *Nature* **543**, 122-+, doi:10.1038/nature21356 (2017).
- 489 6 Wu, S. H. *et al.* Circular ecDNA promotes accessible chromatin and high oncogene  
490 expression. *Nature* **575**, 699-+, doi:10.1038/s41586-019-1763-5 (2019).
- 491 7 Kim, H. *et al.* Extrachromosomal DNA is associated with oncogene amplification and  
492 poor outcome across multiple cancers. *Nat Genet* **52**, 891-+, doi:10.1038/s41588-020-  
493 0678-2 (2020).
- 494 8 deCarvalho, A. C. *et al.* Discordant inheritance of chromosomal and extrachromosomal  
495 DNA elements contributes to dynamic disease evolution in glioblastoma. *Nat Genet* **50**,  
496 708-+, doi:10.1038/s41588-018-0105-0 (2018).
- 497 9 Li, K. Mortality and incidence trends from esophagus cancer in selected geographic  
498 areas of china circa 1970-90. *Int J Cancer* **102**, 271-274, doi:10.1002/jhc.10706 (2002).
- 499 10 Wang, L. D., Zhou, Q. & Yang, C. S. Esophageal and gastric cardia epithelial cell  
500 proliferation in northern Chinese subjects living in a high-incidence area. *J Cell Biochem*  
501 *Suppl* **28-29**, 159-165 (1997).
- 502 11 Wang, L. D. *et al.* Genome-wide association study of esophageal squamous cell  
503 carcinoma in Chinese subjects identifies susceptibility loci at PLCE1 and C20orf54. *Nat*  
504 *Genet* **42**, 759-U746, doi:10.1038/ng.648 (2010).
- 505 12 Hu, N. *et al.* Genomic Landscape of Somatic Alterations in Esophageal Squamous Cell  
506 Carcinoma and Gastric Cancer. *Cancer Res* **76**, 1714-1723, doi:10.1158/0008-  
507 5472.Can-15-0338 (2016).
- 508 13 James D. Brierley, M. K. G., Christian Wittekind. *TNM Classification of Malignant*  
509 *Tumours, 8th Edition.* (Wiley-Blackwell, 2016).
- 510 14 Li, Y., Li, J. & Li, J. Two updates on oesophagogastric junction adenocarcinoma from  
511 the fifth WHO classification: Alteration of definition and emphasis on HER2 test. *Histol*  
512 *Histopathol* **36**, 339-346, doi:10.14670/HH-18-296 (2021).
- 513 15 Maric, R. & Cheng, K. K. Classification of adenocarcinoma of the oesophagogastric  
514 junction. *Br J Surg* **86**, 1098-1099, doi:10.1046/j.1365-2168.1999.01197-15.x (1999).
- 515 16 Moureau-Zabotto, L. *et al.* Impact of the Siewert Classification on the Outcome of  
516 Patients Treated by Preoperative Chemoradiotherapy for a Nonmetastatic  
517 Adenocarcinoma of the Oesophagogastric Junction. *Gastroenterol Res Pract* **2015**,  
518 404203, doi:10.1155/2015/404203 (2015).
- 519 17 Siewert, J. R. & Stein, H. J. Classification of adenocarcinoma of the oesophagogastric  
520 junction. *Br J Surg* **85**, 1457-1459, doi:10.1046/j.1365-2168.1998.00940.x (1998).
- 521 18 Wang, L. D., Zheng, S., Zheng, Z. Y. & Casson, A. G. Primary adenocarcinomas of lower  
522 esophagus, esophagogastric junction and gastric cardia: in special reference to China.  
523 *World J Gastroenterol* **9**, 1156-1164, doi:10.3748/wjg.v9.i6.1156 (2003).
- 524 19 Y. Guanrei, a. Q. S. Incidence Rate of Adenocarcinoma of the Gastric Cardia, and  
525 Endoscopic Classification of Early Cardial Carcinoma in Henan Province, the People's  
526 Republic of China. *Endoscopy* **19**, 7-10 (1987).

- 527 20 Frankell, A. M. *et al.* The landscape of selection in 551 esophageal adenocarcinomas  
528 defines genomic biomarkers for the clinic. *Nat Genet* **51**, 506-516,  
529 doi:10.1038/s41588-018-0331-5 (2019).
- 530 21 Deshpande, V. *et al.* Exploring the landscape of focal amplifications in cancer using  
531 AmpliconArchitect. *Nat Commun* **10**, doi:ARTN 392  
532 10.1038/s41467-018-08200-y (2019).
- 533 22 Suh, Y. S. *et al.* Comprehensive Molecular Characterization of Adenocarcinoma of the  
534 Gastroesophageal Junction Between Esophageal and Gastric Adenocarcinomas. *Ann*  
535 *Surg*, doi:10.1097/SLA.0000000000004303 (2020).
- 536 23 Kumar, P. *et al.* Normal and Cancerous Tissues Release Extrachromosomal Circular  
537 DNA (eccDNA) into the Circulation. *Mol Cancer Res* **15**, 1197-1205, doi:10.1158/1541-  
538 7786.Mcr-17-0095 (2017).
- 539 24 Dillon, L. W. *et al.* Production of Extrachromosomal MicroDNAs Is Linked to Mismatch  
540 Repair Pathways and Transcriptional Activity. *Cell Rep* **11**, 1749-1759,  
541 doi:10.1016/j.celrep.2015.05.020 (2015).
- 542 25 Shibata, Y. *et al.* Extrachromosomal MicroDNAs and Chromosomal Microdeletions in  
543 Normal Tissues. *Science* **336**, 82-86, doi:10.1126/science.1213307 (2012).
- 544 26 Wong, S. S. *et al.* Genomic landscape and genetic heterogeneity in gastric  
545 adenocarcinoma revealed by whole-genome sequencing. *Nat Commun* **5**, 5477,  
546 doi:10.1038/ncomms6477 (2014).
- 547 27 Sergina, N. V. & Moasser, M. M. The HER family and cancer: emerging molecular  
548 mechanisms and therapeutic targets. *Trends Mol Med* **13**, 527-534,  
549 doi:10.1016/j.molmed.2007.10.002 (2007).
- 550 28 Nielsen, T. O., Friis-Hansen, L., Poulsen, S. S., Federspiel, B. & Sorensen, B. S. Expression  
551 of the EGF Family in Gastric Cancer: Downregulation of HER4 and Its Activating Ligand  
552 NRG4. *Plos One* **9**, doi:ARTN e94606  
553 10.1371/journal.pone.0094606 (2014).
- 554 29 Moller, H. D. Circle-Seq: Isolation and Sequencing of Chromosome-Derived Circular  
555 DNA Elements in Cells. *Methods Mol Biol* **2119**, 165-181, doi:10.1007/978-1-0716-  
556 0323-9\_15 (2020).
- 557 30 Duttke, S. H., Chang, M. W., Heinz, S. & Benner, C. Identification and dynamic  
558 quantification of regulatory elements using total RNA. *Genome Res* **29**, 1836-1846,  
559 doi:10.1101/gr.253492.119 (2019).
- 560 31 Forment, J. V., Kaidi, A. & Jackson, S. P. Chromothripsis and cancer: causes and  
561 consequences of chromosome shattering. *Nat Rev Cancer* **12**, 663-670,  
562 doi:10.1038/nrc3352 (2012).
- 563 32 Voronina, N. *et al.* The landscape of chromothripsis across adult cancer types. *Nat*  
564 *Commun* **11**, 2320, doi:10.1038/s41467-020-16134-7 (2020).
- 565 33 Cortes-Ciriano, I. *et al.* Comprehensive analysis of chromothripsis in 2,658 human  
566 cancers using whole-genome sequencing. *Nat Genet* **52**, 331+, doi:10.1038/s41588-  
567 019-0576-7 (2020).
- 568 34 Cortes-Ciriano, I. *et al.* Comprehensive analysis of chromothripsis in 2,658 human  
569 cancers using whole-genome sequencing. *Cancer Res* **78**, doi:10.1158/1538-  
570 7445.Am2018-Lb-378 (2018).
- 571 35 Zhang, C. Z. *et al.* Chromothripsis from DNA damage in micronuclei. *Nature* **522**, 179-  
572 184, doi:10.1038/nature14493 (2015).

- 573 36 Przybytkowski, E. *et al.* Chromosome-breakage genomic instability and chromothripsis  
574 in breast cancer. *BMC Genomics* **15**, 579, doi:10.1186/1471-2164-15-579 (2014).
- 575 37 Zhang, C. Z., Leibowitz, M. L. & Pellman, D. Chromothripsis and beyond: rapid genome  
576 evolution from complex chromosomal rearrangements. *Genes Dev* **27**, 2513-2530,  
577 doi:10.1101/gad.229559.113 (2013).
- 578 38 Ratnaparkhe, M. *et al.* Defective DNA damage repair leads to frequent catastrophic  
579 genomic events in murine and human tumors. *Nat Commun* **9**, 4760,  
580 doi:10.1038/s41467-018-06925-4 (2018).
- 581 39 Umbreit, N. T. *et al.* Mechanisms generating cancer genome complexity from a single  
582 cell division error. *Science* **368**, doi:10.1126/science.aba0712 (2020).
- 583 40 Lindor, N. M. *et al.* Immunohistochemistry versus microsatellite instability testing in  
584 phenotyping colorectal tumors. *J Clin Oncol* **20**, 1043-1048,  
585 doi:10.1200/JCO.2002.20.4.1043 (2002).
- 586 41 Chen, L. Z., Chen, G., Zheng, X. W. & Chen, Y. Expression status of four mismatch repair  
587 proteins in patients with colorectal cancer: clinical significance in 1238 cases. *Int J Clin*  
588 *Exp Patho* **12**, 3685-3699 (2019).
- 589 42 Birkbak, N. J. *et al.* Paradoxical Relationship between Chromosomal Instability and  
590 Survival Outcome in Cancer. *Cancer Res* **71**, 3447-3452, doi:10.1158/0008-5472.Can-  
591 10-3667 (2011).
- 592 43 Turinetto, V. & Giachino, C. Multiple facets of histone variant H2AX: a DNA double-  
593 strand-break marker with several biological functions. *Nucleic Acids Res* **43**, 2489-2498,  
594 doi:10.1093/nar/gkv061 (2015).
- 595 44 Taylor, P. R. *et al.* Prevention of Esophageal Cancer - the Nutrition Intervention Trials  
596 in Linxian, China. *Cancer Res* **54**, S2029-S2031 (1994).
- 597 45 Weitberg, A. B. & Corvese, D. Effect of vitamin E and beta-carotene on DNA strand  
598 breakage induced by tobacco-specific nitrosamines and stimulated human phagocytes.  
599 *J Exp Clin Cancer Res* **16**, 11-14 (1997).
- 600 46 Wang, L. *et al.* Mutations of O6-methylguanine-DNA methyltransferase gene in  
601 esophageal cancer tissues from Northern China. *Int J Cancer* **71**, 719-723,  
602 doi:10.1002/(sici)1097-0215(19970529)71:5<719::aid-ijc5>3.0.co;2-u (1997).
- 603 47 Deng, C. *et al.* Genetic polymorphism of human O6-alkylguanine-DNA alkyltransferase:  
604 identification of a missense variation in the active site region. *Pharmacogenetics* **9**, 81-  
605 87, doi:10.1097/00008571-199902000-00011 (1999).
- 606 48 Groenen, P. J. & Busink, E. Alkylating Activity in Food-Products - Especially Sauerkraut  
607 and Sour Fermented Dairy-Products after Incubation with Nitrite under Quasi-Gastric  
608 Conditions. *Food Chem Toxicol* **26**, 215-225, doi:Doi 10.1016/0278-6915(88)90122-6  
609 (1988).
- 610 49 Duell, E. J. *et al.* Vitamin C transporter gene (SLC23A1 and SLC23A2) polymorphisms,  
611 plasma vitamin C levels, and gastric cancer risk in the EPIC cohort. *Genes Nutr* **8**, 549-  
612 560, doi:10.1007/s12263-013-0346-6 (2013).
- 613 50 Hodgson, R. M., Wiessler, M. & Kleihues, P. Preferential methylation of target organ  
614 DNA by the oesophageal carcinogen N-nitrosomethylbenzylamine. *Carcinogenesis* **1**,  
615 861-866, doi:10.1093/carcin/1.10.861 (1980).
- 616 51 Verhaak, R. G. W., Bafna, V. & Mischel, P. S. Extrachromosomal oncogene amplification  
617 in tumour pathogenesis and evolution. *Nat Rev Cancer* **19**, 283-288,  
618 doi:10.1038/s41568-019-0128-6 (2019).



- 619 52 Wu, S. *et al.* Circular ecDNA promotes accessible chromatin and high oncogene  
620 expression. *Nature* **575**, 699-703, doi:10.1038/s41586-019-1763-5 (2019).
- 621 53 Park, J. B., Rhim, J. S., Park, S. C., Kimm, S. W. & Kraus, M. H. Amplification,  
622 Overexpression, and Rearrangement of the ErbB-2 Protooncogene in Primary Human  
623 Stomach Carcinomas. *Cancer Res* **49**, 6605-6609 (1989).
- 624 54 Huang, J. X. *et al.* HER2 gene amplification in esophageal squamous cell carcinoma is  
625 less than in gastroesophageal junction and gastric adenocarcinoma. *Oncol Lett* **6**, 13-  
626 18, doi:10.3892/ol.2013.1348 (2013).
- 627 55 Houldsworth, J., Cordoncardo, C., Ladanyi, M., Kelsen, D. P. & Chaganti, R. S. K. Gene  
628 Amplification in Gastric and Esophageal Adenocarcinomas. *Cancer Res* **50**, 6417-6422  
629 (1990).
- 630 56 Plum, P. S. *et al.* HER2/neu (ERBB2) expression and gene amplification correlates with  
631 better survival in esophageal adenocarcinoma. *BMC Cancer* **19**, 38,  
632 doi:10.1186/s12885-018-5242-4 (2019).
- 633

634 **Supplementary Figures 1-14 are in the separated file.**

635 **Supplementary Table 1-8 is in the separated file.**

636 **Materials and Methods**

637 **GCA samples collection and follow-up visiting of patients**

638 All clinical samples were collected following the ethic permit from the local hospitals located at  
639 high-incidence areas of GCA in the Taihang Mountains of north central China. All patients in  
640 our study were not received radiotherapy or chemotherapy before the surgery. 1668 GCA  
641 patients for ERBB2 immunohistochemistry (IHC) staining are from the Esophageal Cancer  
642 database (from years of 1973-2020) which established and maintained by Henan Key  
643 Laboratory for Esophageal Cancer Research of the First Affiliated Hospital, Zhengzhou  
644 University, China<sup>1-4</sup>. In our Esophageal cancer database, Clinical GCA tumors and matched  
645 normal tissues are both preserved with snap freezing in liquid nitrogen and archived in  
646 formalin-fixed paraffin-embedded (FFPE) tissue block for each GCA patient. In the studies of  
647 whole genome sequencing (WGS), whole exome sequencing (WES), RNA-Seq and protein  
648 expression measurement with mass spectrometry, snap freezing samples were used. In the  
649 study of IHC staining, FFPE samples were applied. The diagnosis of GCA patients were  
650 always identified by two well-trained pathologists in the pathology department of the local  
651 hospital, where the hematoxylin and eosin (HE) staining was used to quantify the content of  
652 tumor cell in tissue section and only GCA samples with more than 80% tumor cells are used  
653 for our study. The matched normal tissue samples were selected from the adjacent epithelial  
654 tissue which is 5-10 cm away from the edge of tumor. Both of 36 pairs of GCA tumor and  
655 matched adjacent normal tissue for whole-genome sequencing (WGS) and 75 pairs of GCA  
656 tumor and matched adjacent normal tissue for whole-exon sequencing (WES) are scanned  
657 and confirmed with two well-trained pathologists in the same procedure. The complete  
658 clinicopathological information of all patients was recorded and included in our study. All  
659 patients are included in regular follow-up visiting plan with following frequency: once every  
660 three months during the first year, once each 6 months during the second year, and once per  
661 year after the third year. The definition of overall survival time for dead patients is a period from  
662 diagnosis to death, and the definition of overall survival time for alive patients is a period from  
663 diagnosis to last follow-up visit (Jan 2021).

664

665 **WGS library preparation and sequencing**

666 WGS sequencing libraries were prepare following the previous report with slight modifications<sup>5</sup>.  
667 In brief, genomic DNA was extracted from snap freezing GCA tumor and matched normal  
668 tissue with DNeasy Blood & Tissue Kit (69504, QIAGEN) following manufacturer instruction.  
669 DNA concentration was measured by Qubit DNA Assay Kit in Qubit 2.0 Fluorometer (Invitrogen).  
670 A total amount of 0.4µg DNA per sample was fragmented to an average size of ~350bp with

671 hydrodynamic shearing system (Covaris, Massachusetts, USA) and subjected to DNA library  
672 preparation with Illumina TruSeq DNA sample preparation kit (15026486, Illumina).  
673 Sequencing was carried out on Illumina NovaSeq 6000 with 150bp paired end mode according  
674 to the manufacturer instruction.

675

#### 676 **WES library preparation and sequencing**

677 WES sequencing libraries were prepared following the previous report with slight modifications<sup>6</sup>.  
678 In brief, genomic DNA was extracted from snap freezing GCA tumor or matched normal tissue  
679 using DNeasy Blood & Tissue Kit (69504, QIAGEN) according to the manufacturer's instruction.  
680 DNA degradation and contamination were monitored on 1% agarose gels. DNA concentration  
681 was measured by Qubit DNA Assay Kit in Qubit 2.0 Fluorometer (Invitrogen). A total amount of  
682 0.6 µg genomic DNA per sample was fragmented to an average size of 180~280bp and  
683 subjected to DNA library preparation using Illumina TruSeq DNA sample preparation kit. The  
684 Agilent SureSelect Human All ExonV5 Kit (5190-6209, Agilent Technologies) was used for  
685 exome capture according to the manufacturer's instruction. In brief, DNA libraries were  
686 hybridized with liquid phase with biotin labeled probes from the Agilent SureSelect Human All  
687 ExonV5 Kit, then magnetic streptavidin beads were used to capture the exons of genes.  
688 Captured DNA fragments were enriched in a PCR reaction with index barcodes for sequencing.  
689 Final libraries were purified using AMPure XP beads (A63880, Beckman Coulter) and  
690 quantified using the Agilent high sensitivity DNA kit (5067-4626, Agilent Technologies). WES  
691 libraries were sequenced on Illumina Novaseq 6000 (Illumina) with 150bp paired end mode  
692 according to the manufacturer instruction.

693

#### 694 **Circle-Seq library preparation and sequencing**

695 EcDNA sequencing Service was provided by CloudSeq Biotech Inc. (Shanghai, China) by  
696 following the published procedures with slight modification<sup>7</sup>. Circle-Seq was performed on 10  
697 pairs of snap freezing GCA tumors and matched normal tissues. In brief, 6 mg of snap freezing  
698 GCA tumors or matched normal tissues tissue were suspended in L1 solution (A&A  
699 Biotechnology, 010-50) and supplemented with 15 µl proteinase K (ThermoFisher, E00491)  
700 before incubation overnight at 50 °C with agitation. After Lysis, samples were alkaline treated,  
701 followed by precipitation of proteins and separation of chromosomal DNA from circular DNA  
702 through an ion exchange membrane column (Plasmid Mini AX; A&A Biotechnology, 010-50).  
703 Column-purified DNA was treated with FastDigest MssI (ER1341, Thermo Scientific,) to  
704 remove mitochondrial circular DNA and incubated at 37 °C for 16 h. Remaining linear DNA  
705 was removed by exonuclease (E3101K, Plasmid-Safe ATP-dependent DNase, Epicentre,) at  
706 37 °C in a heating block and enzyme reaction was carried out continuously for 1 week, adding  
707 additional ATP and DNase every 24 h (30 units per day) according to the manufacturer's

708 protocol (E3101K, Plasmid-Safe ATP-dependent DNase, Epicentre,). ecDNA-enriched  
709 samples were used as template for phi29 polymerase amplification reactions (150043, REPLI-  
710 g Midi Kit) amplifying ecDNA at 30 °C for 2 days (46–48 h). Phi29-amplified DNA was sheared  
711 by sonication (Bioruptor), and the fragmented DNA was subjected to library preparation with  
712 NEBNext® Ultra II DNA Library Prep Kit for Illumina (E7645S, New England Biolabs).  
713 Sequencing was carried out on Illumina NovaSeq 6000 with 150bp paired end mode.

714

#### 715 ***ERBB2* RNA expression measurement and *ERBB2* protein expression measurement in** 716 **GCA patients**

717 *ERBB2* RNA expression measurement and *ERBB2* protein expression measurement in 44  
718 GCA patients from our Esophageal Cancer database (from years of 1973-2020), where  
719 *ERBB2* RNA expression (Normalized value with RPKM (Reads Per Kilobase Million)) was  
720 extracted from RNA-seq data, and *ERBB2* protein expression was extracted from mass  
721 spectrometry. For same GCA patient, both library for RNA-seq and library for mass  
722 spectrometry (MS) are prepared. The procedures of libraries preparation are briefly  
723 described as below. For RNA-seq library preparation: First, 100mg of each snap freezing  
724 GCA tumor tissue was used for total RNA isolation with TRIzol® Reagent (15596026,  
725 Thermo Fisher Scientific). RNA purity was checked using the NanoPhotometer®  
726 spectrophotometer (IMPLEN). RNA concentration was measured using Qubit® RNA Assay  
727 Kit in Qubit® 2.0 Fluorometer (Life Technologies). RNA integrity was assessed using the  
728 Bioanalyzer 2100 system (Agilent Technologies). Then, two RNA-seq libraries were prepared  
729 for each GCA patients with technical replicates. 50ng total RNA was used as input for each  
730 RNA library preparation. The RNA-Seq libraries were prepared with NEBNext® Ultra™ RNA  
731 Library Prep Kit for Illumina (E7530L, NEB) by following manufacturer's instruction. RNA-seq  
732 libraries were purified with AMPure XP beads (A63880, Beckman Coulter) to select 150~200  
733 bp cDNA fragments. Sequencing library was quantified on the Bioanalyzer 2100 system  
734 (Agilent Technologies). The libraries were sequenced on an Illumina Novaseq 6000 platform  
735 with 150 bp paired-end reads. The RNA-seq sequencing libraries were aligned to the  
736 genome using STAR<sup>8</sup> with default parameter to reference genome (hg19). After the  
737 alignment, the *ERBB2* RNA expression are extracted, and normalized with RPKM. The final  
738 expression data for individual patient used to compare with protein expression is the average  
739 value of two technical replicates. For mass spectrometry library preparation: First, 10 mg of  
740 snap freezing GCA tumor tissues were grinded with liquid nitrogen into powder and then  
741 transferred to a 5-mL centrifuge tube. After that, four volumes of lysis buffer (1% Triton X-  
742 100, 1% protease inhibitor cocktail, 1% phosphatase inhibitor) was added to the cell powder,  
743 followed by sonication three times on ice using a high intensity ultrasonic processor  
744 (Scientz). The remaining debris was removed by centrifugation at 12,000 g at 4 °C for 10

745 min. After centrifugation, the supernatant was collected and the protein concentration was  
746 measured with Pierce™ BCA protein kit (23227, Thermo Fisher Scientific) according to the  
747 manufacturer's instruction. Then, the 100 µg of protein from each sample was taken for  
748 protein digestion, and the volume was adjusted to the same with lysate. The sample was  
749 slowly added to the final concentration of 20% v/v trichloroacetic acid (TCA) to precipitate  
750 protein, then vortexed to mix and incubated for 2hs at 4 °C. The precipitated protein was  
751 collected by centrifugation at 4500 g for 5 min at 4 °C. The precipitated protein was washed  
752 with pre-cooled acetone for 3 times to remove traces of TCA and finally acetone was  
753 removed by drying in a fume cupboard. The protein sample was then added 100 mM  
754 Triethylammonium bicarbonate (TEAB) and ultrasonically dispersed. Trypsin was added at  
755 1:50 trypsin-to-protein mass ratio for the first digestion overnight. The sample was reduced  
756 with 5 mM dithiothreitol for 30 min at 56 °C and alkylated with 11 mM iodoacetamide for 15  
757 min at room temperature in darkness. Next, 50 µg of tryptic peptides were firstly dissolved in  
758 0.5 M TEAB. Each channel of peptide was labeled with their respective TMT reagent, and  
759 incubated for 2 hours at room temperature. Five microliters of each sample were pooled,  
760 desalted and analyzed by MS to check labeling efficiency. After labeling efficiency check,  
761 samples were quenched by adding 5% hydroxylamine. The pooled samples were then  
762 desalted with Strata X C18 SPE column (Phenomenex) and dried by vacuum centrifugation.  
763 Then, the dried tryptic peptides were dissolved in solvent A (0.1% formic acid, 2%  
764 acetonitrile/ in water), directly loaded onto a home-made reversed-phase analytical column  
765 (25-cm length, 100 µm i.d.). Peptides were separated with a gradient from 8% to 10% solvent  
766 B (0.1% formic acid in 90% acetonitrile) over 2 min, 10% to 23% solvent B over 38 min, 23%  
767 to 33% in 14 min and climbing to 80% in 3 min then holding at 80% for the last 3 min, all at a  
768 constant flowrate of 450 nL/min on an EASY-nLC 1200 UPLC system (Thermo Fisher  
769 Scientific). The separated peptides were analyzed in Q Exactive™ HF-X (Thermo Fisher  
770 Scientific) with a nano-electrospray ion source. The electrospray voltage applied was 2.2 kV.  
771 The full MS scan resolution was set to 120,000 for a scan range of 400–1500 m/z. Up to 20  
772 most abundant precursors were then selected for further MS/MS analyses with 30 s dynamic  
773 exclusion. The HCD fragmentation was performed at a normalized collision energy (NCE) of  
774 28%. The fragments were detected in the Orbitrap at a resolution of 45,000. Fixed first mass  
775 was set as 100 m/z. Automatic gain control (AGC) target was set at 5E4, with an intensity  
776 threshold of 5.8E4 and a maximum injection time of 86 ms. The resulting MS/MS data were  
777 processed using MaxQuant search engine (v.1.6.10.43). Tandem mass spectra were  
778 searched against the human SwissProt database (20366 entries) concatenated with reverse  
779 decoy database. Trypsin/P was specified as cleavage enzyme allowing up to 2 missing  
780 cleavages. The mass tolerance for precursor ions was set as 10 ppm in First search and 5  
781 ppm in Main search, and the mass tolerance for fragment ions was set as 0.02 Da.

782 Carbamidomethyl on Cys was specified as fixed modification. Acetylation on protein N-  
783 terminal, oxidation on Met and deamidation (NQ) were specified as variable modifications.  
784 TMT-11plex quantification was performed. FDR was adjusted to < 1% and minimum score  
785 for peptides was set > 40. The ERBB2 protein expression level for each patient was  
786 extracted from protein lists of MS result.

787

## 788 **Data analysis of WGS data, WES data, copy number alteration (CNA) and ecDNA** 789 **amplicons**

790 All detailed scripts were deposited in following link: [https://github.com/chenlab2019/ecDNA-](https://github.com/chenlab2019/ecDNA-on-GCA)  
791 [on-GCA](https://github.com/chenlab2019/ecDNA-on-GCA). The WGS data of 36 samples were aligned to the reference genome (hg19) using  
792 BWA-MEM v.0.7.17<sup>9</sup> with the default parameter and were sorted by SAMtools v.1.9<sup>10</sup>. PCR  
793 duplicates were removed from aligned BAM files by Sambamba v.0.7.0<sup>11</sup>. By taking matched  
794 normal samples as background, tumor-specific CNAs were called by copyCat package  
795 (<https://github.com/chrisamiller/copyCat>) which is loosely based on readDepth<sup>12</sup>. During the  
796 process of CNA calling, bam-window tools (<https://github.com/genome-vendor/bam-window>)  
797 was used to count reads in 10Kbp window size. AmpliconArchitect (AA) was applied to filter  
798 CNAs with copy number greater than 4x and size greater than 100Kbp. The adjacent CNAs  
799 were merged into a single interval. These intervals were fed into AmpliconArchitect software<sup>13</sup>  
800 as seeds to detect ecDNA amplicons<sup>14</sup>. The oncogene annotation of ecDNA amplicons was  
801 based on the genome intervals of amplicons following AA pipeline<sup>13</sup>. The genomic annotation  
802 of ecDNA amplicons was performed with intersection between regions of ecDNA amplicons  
803 and genomic annotation of reference genome (hg19) with bedtools<sup>15</sup>. In brief, regions of the  
804 ecDNA amplicons were extracted from the output of AA software. The intersection between  
805 genomic annotation of reference genome (hg19) and ecDNA regions was performed with  
806 bedtools first<sup>15</sup>, then the length of overlapping regions between genomic elements from  
807 reference genome and ecDNA regions was extracted. Genomic elements were annotated to  
808 ecDNA amplicons if there was one bp or longer overlapping. The occupancy of coding regions  
809 and exons regions in ecDNA amplicons were calculated with following formulas:

810

$$811 \quad \text{occupancy of coding regions in ecDNA (\%)} = \frac{\text{total length of coding regions} \\ \text{in all ecDNA amplicons}}{\text{total length of} \\ \text{all ecDNA amplicons}} \times 100$$

812

813

$$814 \quad \text{occupancy of exon regions in ecDNA (\%)} = \frac{\text{total length of exon regions} \\ \text{in all ecDNA amplicons}}{\text{total length of} \\ \text{all ecDNA amplicons}} \times 100$$

815  
816  
817  
818  
819  
820  
821  
822  
823  
824  
825  
826  
827  
828  
829  
830  
831  
832  
833  
834  
835  
836  
837  
838  
839  
840  
841  
842  
843  
844  
845  
846  
847  
848  
849  
850  
851

EcDNA amplicons were further classified into different categories (linear, complex, circular, breakage-fusion-bridge (BFB) and invalid) with AA software (<https://github.com/jluebeck/AmpliconClassifier>) by following the previous report<sup>16</sup>. Circle-finder<sup>17-19</sup> was used to confirm the circular structure of ecDNA amplicons by following the instruction, where circular junction points were detected with sequencing reads orientation. The length of overlapping region between circular ecDNA predicted from AA and circular ecDNA detected with Circle-finder was calculated with bedtools. When the length of overlapping region is longer than 1bp, circular ecDNA amplicons from AA were labelled as overlapping with results of Circle-finder.

For WES data analysis from 75 pairs of GCA tumor samples and matched adjacent normal tissues: sequencing reads containing adaptors and low-quality reads were removed and aligned to human reference genome (hg19) using BWA-MEM v.0.7.17<sup>9</sup> with the default parameter and sorted by SAMtools v.1.9<sup>10</sup>. All non-primary alignments were filtered by SAMtools. PCR duplicates were marked using Picard. CNAs from tumor was called by using matched adjacent normal tissues by CNVkit<sup>20</sup>. The numbers of CNAs on ERBB2 gene from each GCA patient are extracted for further analysis.

### Data mining of Circle-seq

All reads were aligned to human genome hg19 using BWA-MEM v.0.7.17<sup>9</sup> with default parameters. PCR duplicates were removed from the BAM file with Sambamba v.0.7.0<sup>9</sup>. By taking normal samples as background, peak calling on tumor samples was performed using variable-width windows of Homer v.4.11 with command *findPeaks tumor -i normal -style histone -fdr 0.001* (<http://homer.ucsd.edu/>)<sup>23</sup>. The tumor-specific enriched peaks were considered as the fragments of circular DNA. Overlaps between enriched peaks from Circle-Seq and ecDNA amplicons from AA were calculated, and circular ecDNA amplicon from AA is labelled as validated when the overlapping regions is 1bp or longer than 1bp. For the visualization of the peak of Circle-Seq, BAM file was converted into bigwig file using deeptools bamCoverage with normalization of counts per million (CPM)<sup>24</sup>.

### Detection of chromothripsis events

All detailed scripts were deposited in following link: <https://github.com/chenlab2019/ecDNA-on-GCA>. Chromothripsis events from 36 pairs of GCA tumor samples were detected with ShatterSeek software v.0.4 using copy number alterations (CNAs) and structural variants (SVs) following the previous report<sup>25</sup>. SVs were identified on tumor samples using the Delly<sup>26</sup> and

852 novoBreak<sup>27</sup> software by taking matched adjacent normal tissues as control, and final list of  
853 SVs are merged lists from Delly and NovoBreak. CNAs from WGS were calculated with  
854 copyCat package<sup>28</sup>. All SVs and CNVs from tumor samples are used to identify chromothripsis  
855 events with ShatterSeek, where SVs and CNVs from matched adjacent normal tissues are  
856 treated as background. Events were considered as high confidence (termed HC) when there  
857 were at least 7 oscillating CN segments, and considered as low confidence (termed LC) when  
858 there were 4-6 oscillating CN segments<sup>11</sup>. The chromothripsis events were labeled as within  
859 regions of ecDNA amplicons when there is 1bp or longer intersection between segments from  
860 chromothripsis and regions of ecDNA amplicons.

861

### 862 **Single-nucleotide variant (SNV) analysis**

863 All detailed scripts were deposited in following link: [https://github.com/chenlab2019/ecDNA-](https://github.com/chenlab2019/ecDNA-on-GCA)  
864 [on-GCA](https://github.com/chenlab2019/ecDNA-on-GCA). All SNVs from WGS were called by GATK v.4.1.7 software<sup>29</sup> with Mutect2 parameter  
865 and filtered by “GATK FilterMutectCalls”. The mutation profiles were visualized by  
866 R/Bioconductor package “maftools”<sup>30</sup>. The number of SNVs within region of ecDNA amplicons  
867 and whole genome region were counted respectively for each sample. The average number  
868 of SNVs per million nucleotides from regions of ecDNA amplicons and whole genome were  
869 calculated with following equations:

870

$$871 \quad \text{SNVs of ecDNA} = \frac{\text{The number of SNVs in ecDNA amplicons}}{\text{The total length of ecDNA amplicons}} \times 1 \text{ million}$$

$$872 \quad \text{SNVs of whole genome} = \frac{\text{The number of SNVs within whole genome}}{\text{The total length of whole genome}} \times 1 \text{ million}$$

873

874 Numbers of SNVs within individual oncogene ecDNA amplicon from groups of absent and  
875 present this gene ecDNA were also compared: first high frequency of oncogene ecDNA  
876 amplicons (appeared at least in 2 patients) in 36 patients are selected, then the number of  
877 SNVs within each selected oncogene from individual patient was calculated and numbers of  
878 SNVs between groups of present and absent this oncogene ecDNA were compared.

879

### 880 **Oncogene ecDNA amplicon analysis**

881 All detailed scripts were deposited in following link: [https://github.com/chenlab2019/ecDNA-](https://github.com/chenlab2019/ecDNA-on-GCA)  
882 [on-GCA](https://github.com/chenlab2019/ecDNA-on-GCA). The list of oncogenes and tumor suppressor genes ecDNA amplicons was extracted  
883 from the report of AmpliconArchitect following AmpliconArchitect workflow<sup>13</sup>. The copy number  
884 of each oncogene from 36 GCA samples was extracted from the report of copyCat.  
885 Oncogenes and/or tumor suppressor genes are labeled as oncogene co-amplification if two or



886 more than two oncogenes and/or tumor suppressor genes are located in the same ecDNA  
887 amplicon.

888

889 **Calculation of Chromosomal instability (CIN):** All detailed scripts were deposited in  
890 following link: <https://github.com/chenlab2019/ecDNA-on-GCA>. The chromosomal instability  
891 (CIN) was calculated following the previous report<sup>31</sup>, and groups of chromosomal instability  
892 (CIN) is defined with by number of genome integrity index (GII). GII was defined as the fraction  
893 of the genome that was altered based on the common regions of alteration. CIN of GCA  
894 patients was divided into four groups based on GII (0-0.2, 0.2-0.4, 0.4-0.6, 0.6-0.8), and 36  
895 GCA patients were assigned into different groups of CIN.

896

### 897 **Prognoses and statistical analysis**

898 All computational codes and scripts are deposited in following  
899 link: <https://github.com/chenlab2019/ecDNA-on-GCA>. R package “survival” with Kaplan-Meier  
900 method was used<sup>32</sup> to calculate and compare patient prognosis between different groups of  
901 GCA patients. The statistic methods used in prognosis analysis with clinicopathological factor  
902 are as follows: Fisher’s exact test for sex, family history cigarette smoking, alcohol consuming  
903 and tumor stage, and Wilcoxon signed-rank test for age. All analyses were performed on R  
904 v.3.6.2, Python v.2.7.16 and Python 3.7.4. The visualization of survival curve was conducted  
905 by ggplot2<sup>33</sup>, karyoploteR<sup>34</sup>, pheatmap R packages and Circos<sup>37</sup>, IGV software<sup>38</sup>.

906

### 907 **Immunohistochemistry (IHC) staining of ERBB2 protein**

908 IHC was performed by following the previous report<sup>39</sup> with slightly modifications. In brief, 5- $\mu$ m  
909 thick formalin fixed paraffin-embedded GCA tissue sections were first deparaffined with  
910 xylene 15mins for 3 times, then were dehydrated through 100% alcohol, 85% alcohol and 75%  
911 alcohol for 5mins each, followed by distilled water rinsing for 5 mins. The epitope retrieval is  
912 performed in the microwave by putting the tissue into citrate buffer (pH 6.0). After the epitope  
913 retrieval, the tissue section is rinsed in Phosphate-Buffered Saline buffer (PBS, PH7.4). After  
914 blocked with 3% bovine serum albumin (BSA) 30mins at room temperature, the tissues were  
915 incubated with ERBB2 antibody (1:100 dilution, SAB5700151, Sigma-Aldrich) overnight at 4°C.  
916 In the next day, the washing is performed with PBS buffer for 3 times, 15mins each. The  
917 secondary antibody (Horseradish Peroxidase, HRP marked, PV-9000, ZSGB-BIO) was  
918 incubated for 50 mins at room temperature. After the secondary antibody incubation, the  
919 washing is performed with PBS buffer 3 times on shaker, 15 mins each. The tissue is stained  
920 with the Harris Hematoxylin for 3 mins. At last, the tissue section was mounted and imaged.  
921 Sections with no signal in any cell were defined as negative groups; sections with 5 or more  
922 cells with ERBB2 positive signal were defined as positive groups.

923 **Immunohistochemistry (IHC) staining of  $\gamma$ H2AX:** The staining protocol is same as ERBB2  
924 staining. The primary antibody of  $\gamma$ H2AX (SAB5700329, Sigma-Aldrich) was with 1:200 dilution.  
925 The staining of  $\gamma$ H2AX was categories into positive and negative groups with following  
926 parameters: Section with no  $\gamma$ H2AX signal in any cell was defined as  $\gamma$ H2AX negative groups;  
927 section with 5 or more cells with  $\gamma$ H2AX positive signal was defined as  $\gamma$ H2AX positive groups.

928  
929 **MSI detection with Immunohistochemistry (IHC) staining:** IHC staining of four mismatch  
930 repair (NMR) proteins: MLH1 (1: 100, PA5-32497, Thermo Fisher Scientific), MSH2 (1: 500,  
931 MA5-15740, Thermo Fisher Scientific), MSH6 (1: 100, MA5-32040, Thermo Fisher Scientific)  
932 and PMS2 (1: 150, MA5-26269, Thermo Fisher Scientific), were performed on 5- $\mu$ m thick  
933 FFPE tumor sections from 36 GCA patient with same protocol as stated as above in ERBB2  
934 IHC staining. The patient was labeled as microsatellite instability (MSI-high) if one of NMR  
935 proteins was negative stained, otherwise the patient is labeled as MSI-low.

936

937

#### 938 **Methods only References:**

- 939 1 Wang, L. *et al.* Mutations of O6-methylguanine-DNA methyltransferase gene in  
940 esophageal cancer tissues from Northern China. *Int J Cancer* **71**, 719-723,  
941 doi:10.1002/(sici)1097-0215(19970529)71:5<719::aid-ijc5>3.0.co;2-u (1997).
- 942 2 Wang, L. D., Zheng, S., Zheng, Z. Y. & Casson, A. G. Primary adenocarcinomas of lower  
943 esophagus, esophagogastric junction and gastric cardia: in special reference to China.  
944 *World J Gastroenterol* **9**, 1156-1164, doi:10.3748/wjg.v9.i6.1156 (2003).
- 945 3 Wang, L. D. *et al.* Genome-wide association study of esophageal squamous cell  
946 carcinoma in Chinese subjects identifies susceptibility loci at PLCE1 and C20orf54. *Nat*  
947 *Genet* **42**, 759-U746, doi:10.1038/ng.648 (2010).
- 948 4 Wang, L. D., Zhou, Q. & Yang, C. S. Esophageal and gastric cardia epithelial cell  
949 proliferation in northern Chinese subjects living in a high-incidence area. *J Cell Biochem*  
950 *Suppl* **28-29**, 159-165 (1997).
- 951 5 Meyer, M. & Kircher, M. Illumina sequencing library preparation for highly multiplexed  
952 target capture and sequencing. *Cold Spring Harb Protoc* **2010**, pdb prot5448,  
953 doi:10.1101/pdb.prot5448 (2010).
- 954 6 Sulonen, A. M. *et al.* Comparison of solution-based exome capture methods for next  
955 generation sequencing. *Genome Biol* **12**, R94, doi:10.1186/gb-2011-12-9-r94 (2011).
- 956 7 Moller, H. D. *et al.* Circular DNA elements of chromosomal origin are common in  
957 healthy human somatic tissue. *Nat Commun* **9**, 1069, doi:10.1038/s41467-018-03369-  
958 8 (2018).
- 959 8 Dobin, A. *et al.* STAR: ultrafast universal RNA-seq aligner. *Bioinformatics* **29**, 15-21,  
960 doi:10.1093/bioinformatics/bts635 (2013).
- 961 9 Li, H. & Durbin, R. Fast and accurate short read alignment with Burrows-Wheeler  
962 transform. *Bioinformatics* **25**, 1754-1760, doi:10.1093/bioinformatics/btp324 (2009).
- 963 10 Li, H. *et al.* The Sequence Alignment/Map format and SAMtools. *Bioinformatics* **25**,  
964 2078-2079, doi:10.1093/bioinformatics/btp352 (2009).

- 965 11 Tarasov, A., Vilella, A. J., Cuppen, E., Nijman, I. J. & Prins, P. Sambamba: fast processing  
966 of NGS alignment formats. *Bioinformatics* **31**, 2032-2034,  
967 doi:10.1093/bioinformatics/btv098 (2015).
- 968 12 Miller, C. A., Hampton, O., Coarfa, C. & Milosavljevic, A. ReadDepth: a parallel R  
969 package for detecting copy number alterations from short sequencing reads. *Plos One*  
970 **6**, e16327, doi:10.1371/journal.pone.0016327 (2011).
- 971 13 Luebeck, J. *et al.* AmpliconReconstructor integrates NGS and optical mapping to  
972 resolve the complex structures of focal amplifications. *Nat Commun* **11**, 4374,  
973 doi:10.1038/s41467-020-18099-z (2020).
- 974 14 Deshpande, V. *et al.* Exploring the landscape of focal amplifications in cancer using  
975 AmpliconArchitect. *Nat Commun* **10**, doi:ARTN 392  
976 10.1038/s41467-018-08200-y (2019).
- 977 15 Quinlan, A. R. & Hall, I. M. BEDTools: a flexible suite of utilities for comparing genomic  
978 features. *Bioinformatics* **26**, 841-842, doi:10.1093/bioinformatics/btq033 (2010).
- 979 16 Kim, H. *et al.* Extrachromosomal DNA is associated with oncogene amplification and  
980 poor outcome across multiple cancers. *Nat Genet* **52**, 891-+, doi:10.1038/s41588-020-  
981 0678-2 (2020).
- 982 17 Kumar, P. *et al.* Normal and Cancerous Tissues Release Extrachromosomal Circular  
983 DNA (eccDNA) into the Circulation. *Mol Cancer Res* **15**, 1197-1205, doi:10.1158/1541-  
984 7786.Mcr-17-0095 (2017).
- 985 18 Dillon, L. W. *et al.* Production of Extrachromosomal MicroDNAs Is Linked to Mismatch  
986 Repair Pathways and Transcriptional Activity. *Cell Rep* **11**, 1749-1759,  
987 doi:10.1016/j.celrep.2015.05.020 (2015).
- 988 19 Shibata, Y. *et al.* Extrachromosomal MicroDNAs and Chromosomal Microdeletions in  
989 Normal Tissues. *Science* **336**, 82-86, doi:10.1126/science.1213307 (2012).
- 990 20 Talevich, E., Shain, A. H., Botton, T. & Bastian, B. C. CNVkit: Genome-Wide Copy  
991 Number Detection and Visualization from Targeted DNA Sequencing. *PLoS Comput Biol*  
992 **12**, e1004873, doi:10.1371/journal.pcbi.1004873 (2016).
- 993 21 Duttke, S. H., Chang, M. W., Heinz, S. & Benner, C. Identification and dynamic  
994 quantification of regulatory elements using total RNA. *Genome Res* **29**, 1836-1846,  
995 doi:10.1101/gr.253492.119 (2019).
- 996 22 Ramirez, F. *et al.* High-resolution TADs reveal DNA sequences underlying genome  
997 organization in flies. *Nat Commun* **9**, 189, doi:10.1038/s41467-017-02525-w (2018).
- 998 23 Heinz, S. *et al.* Simple combinations of lineage-determining transcription factors prime  
999 cis-regulatory elements required for macrophage and B cell identities. *Mol Cell* **38**, 576-  
1000 589, doi:10.1016/j.molcel.2010.05.004 (2010).
- 1001 24 Ramirez, F., Dundar, F., Diehl, S., Gruning, B. A. & Manke, T. deepTools: a flexible  
1002 platform for exploring deep-sequencing data. *Nucleic Acids Res* **42**, W187-191,  
1003 doi:10.1093/nar/gku365 (2014).
- 1004 25 Cortes-Ciriano, I. *et al.* Comprehensive analysis of chromothripsis in 2,658 human  
1005 cancers using whole-genome sequencing. *Nat Genet* **52**, 331-+, doi:10.1038/s41588-  
1006 019-0576-7 (2020).
- 1007 26 Rausch, T. *et al.* DELLY: structural variant discovery by integrated paired-end and split-  
1008 read analysis. *Bioinformatics* **28**, i333-i339, doi:10.1093/bioinformatics/bts378 (2012).
- 1009 27 Chong, Z. *et al.* novoBreak: local assembly for breakpoint detection in cancer genomes.  
1010 *Nat Methods* **14**, 65-67, doi:10.1038/nmeth.4084 (2017).

- 1011 28 Gao, R. *et al.* Delineating copy number and clonal substructure in human tumors from  
1012 single-cell transcriptomes. *Nat Biotechnol* **39**, 599-608, doi:10.1038/s41587-020-  
1013 00795-2 (2021).
- 1014 29 McKenna, A. *et al.* The Genome Analysis Toolkit: a MapReduce framework for  
1015 analyzing next-generation DNA sequencing data. *Genome Res* **20**, 1297-1303,  
1016 doi:10.1101/gr.107524.110 (2010).
- 1017 30 Mayakonda, A., Lin, D. C., Assenov, Y., Plass, C. & Koeffler, H. P. Maftools: efficient and  
1018 comprehensive analysis of somatic variants in cancer. *Genome Res* **28**, 1747-1756,  
1019 doi:10.1101/gr.239244.118 (2018).
- 1020 31 Birnbak, N. J. *et al.* Paradoxical Relationship between Chromosomal Instability and  
1021 Survival Outcome in Cancer. *Cancer Res* **71**, 3447-3452, doi:10.1158/0008-5472.Can-  
1022 10-3667 (2011).
- 1023 32 Li, J. C. A. Modeling survival data: Extending the Cox model. *Sociol Method Res* **32**, 117-  
1024 120, doi:Doi 10.1177/0049124103031004005 (2003).
- 1025 33 Villanueva, R. A. M. & Chen, Z. J. ggplot2: Elegant Graphics for Data Analysis, 2nd  
1026 edition. *Meas-Interdiscip Res* **17**, 160-167, doi:10.1080/15366367.2019.1565254  
1027 (2019).
- 1028 34 Gel, B. & Serra, E. karyoploteR: an R/Bioconductor package to plot customizable  
1029 genomes displaying arbitrary data. *Bioinformatics* **33**, 3088-3090,  
1030 doi:10.1093/bioinformatics/btx346 (2017).
- 1031 35 Krzywinski, M. *et al.* Circos: An information aesthetic for comparative genomics.  
1032 *Genome Res* **19**, 1639-1645, doi:10.1101/gr.092759.109 (2009).
- 1033 36 Thorvaldsdottir, H., Robinson, J. T. & Mesirov, J. P. Integrative Genomics Viewer (IGV):  
1034 high-performance genomics data visualization and exploration. *Brief Bioinform* **14**,  
1035 178-192, doi:10.1093/bib/bbs017 (2013).
- 1036 37 Krzywinski, M. *et al.* Circos: an information aesthetic for comparative genomics.  
1037 *Genome Res* **19**, 1639-1645, doi:10.1101/gr.092759.109 (2009).
- 1038 38 Thorvaldsdottir, H., Robinson, J. T. & Mesirov, J. P. Integrative Genomics Viewer (IGV):  
1039 high-performance genomics data visualization and exploration. *Brief Bioinform* **14**,  
1040 178-192, doi:10.1093/bib/bbs017 (2013).
- 1041 39 Robertson, D., Savage, K., Reis-Filho, J. S. & Isacke, C. M. Multiple immunofluorescence  
1042 labelling of formalin-fixed paraffin-embedded (FFPE) tissue. *BMC Cell Biol* **9**, 13,  
1043 doi:10.1186/1471-2121-9-13 (2008).
- 1044

1045 **Figure Legends:**

1046 **Figure 1: Identification and characterization of ecDNA amplicons from whole-genome**  
1047 **sequencing data of the GCA cohort.**

1048 **a**, Schematic of the experiment design for detecting ecDNA amplicons from WGS data of 36  
1049 pairs of GCA tumour and tumour-adjacent normal tissue from a high incidence GCA rate region  
1050 in the northern region of China.

1051 **b**, Detailed characterization of ecDNA amplicons from 36 GCAs, where ecDNA amplicons are  
1052 further classified into circular, complex, linear, breakage-fusion-bridge (BFB) and invalid.

1053 **c**, Genomic annotation of all ecDNA amplicons, where the annotation was defined by  
1054 overlapping gene regions and regions of ecDNA amplicons. TSG = tumour suppressor gene.

1055 **d**, Distribution of high-frequency oncogene and tumour suppressor gene (TSG) amplicons  
1056 across all 36 samples.

1057 **e**, The summary of oncogene ecDNA co-amplification in our cohort, where co-amplification is  
1058 defined when two or more than two oncogenes are in the same ecDNA amplicon;

1059 **f**, *EGFR* and *CDK6* are located in the same circular ecDNA amplicon, where the genome  
1060 coverage on the left panel represents gene amplification of *EGFR* and *CDK6*, and the circular  
1061 structure on the right panel is the reconstruction of *EGFR* and *CDK6* in the same circular  
1062 ecDNA.

1063

1064 **Figure 2: Validation of the ecDNA amplicons using Circle-seq.**

1065 **a**, Summary of ecDNA overlapping lists from the prediction of AmpliconArchitect (AA) and  
1066 identification using Circle-seq. The y-axis is the ecDNA amplicon number from WGS prediction.  
1067 Overlap: the ecDNA amplicons were identified using both AA software from WGS and Circle-  
1068 Seq. None: the ecDNA amplicons were only identified using AA software but not using Circle-  
1069 Seq.

1070 **b**, The genome browser track at the *FGFR2* gene locus from whole-genome sequencing (WGS)  
1071 and Circle-seq. The connection lines on the top represent the potential structure combination  
1072 in ecDNA amplicons predicted by AA software. N = normal tissue, T = tumour tissue.

1073

1074 **Figure 3: EcDNA amplicon and chromothripsis in GCA patients.**

1075 **a**, Summary of chromothripsis events across the whole genome in our GCA cohort. HC = high  
1076 confidence chromothripsis; LC = low confidence chromothripsis.

1077 **b**, *ERBB2* ecDNA amplicon in the event of chromothripsis from one GCA patient. The different  
1078 connection lines on the top represent the potential different formats of chromothripsis events  
1079 at the *ERBB2* gene. CN = copy number.

1080 **c**, Summary of overlapping frequency between ecDNA amplicon and chromothripsis in the  
1081 GCA cohort. HC = high confidence chromothripsis; LC = low confidence chromothripsis.

1082 **d**, The correlation between total length of ecDNA amplicons and the frequency of  
1083 chromothripsis in GCA patients, where each dot represents one sample.

1084 **e**, Representative images of  $\gamma$ H2AX immunohistochemistry (IHC) staining in our GCA cohort.

1085 **f**, Presence and absence of chromothripsis in  $\gamma$ H2AX-positive and  $\gamma$ H2AX-negative groups of  
1086 GCA patients. The numbers on the bars are patient numbers.

1087 **g**, Comparisons of the total length of chromothripsis in  $\gamma$ H2AX-positive and  $\gamma$ H2AX-negative  
1088 GCA patients, where each dot represents one patient, and the length of chromothripsis is the  
1089 total length of all chromosomes in each sample. The p-value was calculated using the  
1090 Wilcoxon signed-rank test.

1091

1092 **Figure 4: Oncogene amplification, ecDNA amplicon presence and prognosis of GCA**  
1093 **patients**

1094 **a**, The relationship between gene copy number and survival time for *CCNE1*, *EGFR*, and  
1095 *ERBB2* genes in the GCA cohort, where copy number of *CCNE1* and *ERBB2* genes were  
1096 divided into three groups, High, Low and Normal, and copy number of the *EGFR* gene was  
1097 divided into two groups, High and Normal. High = high copy number of gene amplification, Low  
1098 = low copy number of gene amplification, Normal = no gene amplification.

1099 **b**, Survival analysis of different groups with three oncogene amplifications (*CCNE1*, *EGFR*,  
1100 and *ERBB2*) in the cohort. The definition of High, Low and Normal is the same as in panel **a**,  
1101 and the p-value was calculated using the Log rank test.

1102 **c**, Survival time of present and absent ecDNA amplicons of three oncogenes in ecDNA  
1103 (*CCNE1*, *EGFR*, and *ERBB2*) in the cohort. The p-value was calculated using the Log rank  
1104 test.

1105 **d**, Kaplan-Meier plot for the presence and absence of *ERBB2* protein expression in GCA tissue  
1106 sections from 1668 GCA patients. Left panel: survival analysis of patients with 0-2 year survival  
1107 after surgery (n = 750); right panel: survival analysis of patients with 2-7 year survival after  
1108 surgery (n = 918). The p-value was calculated using the Log rank test.

1109

Figure 1

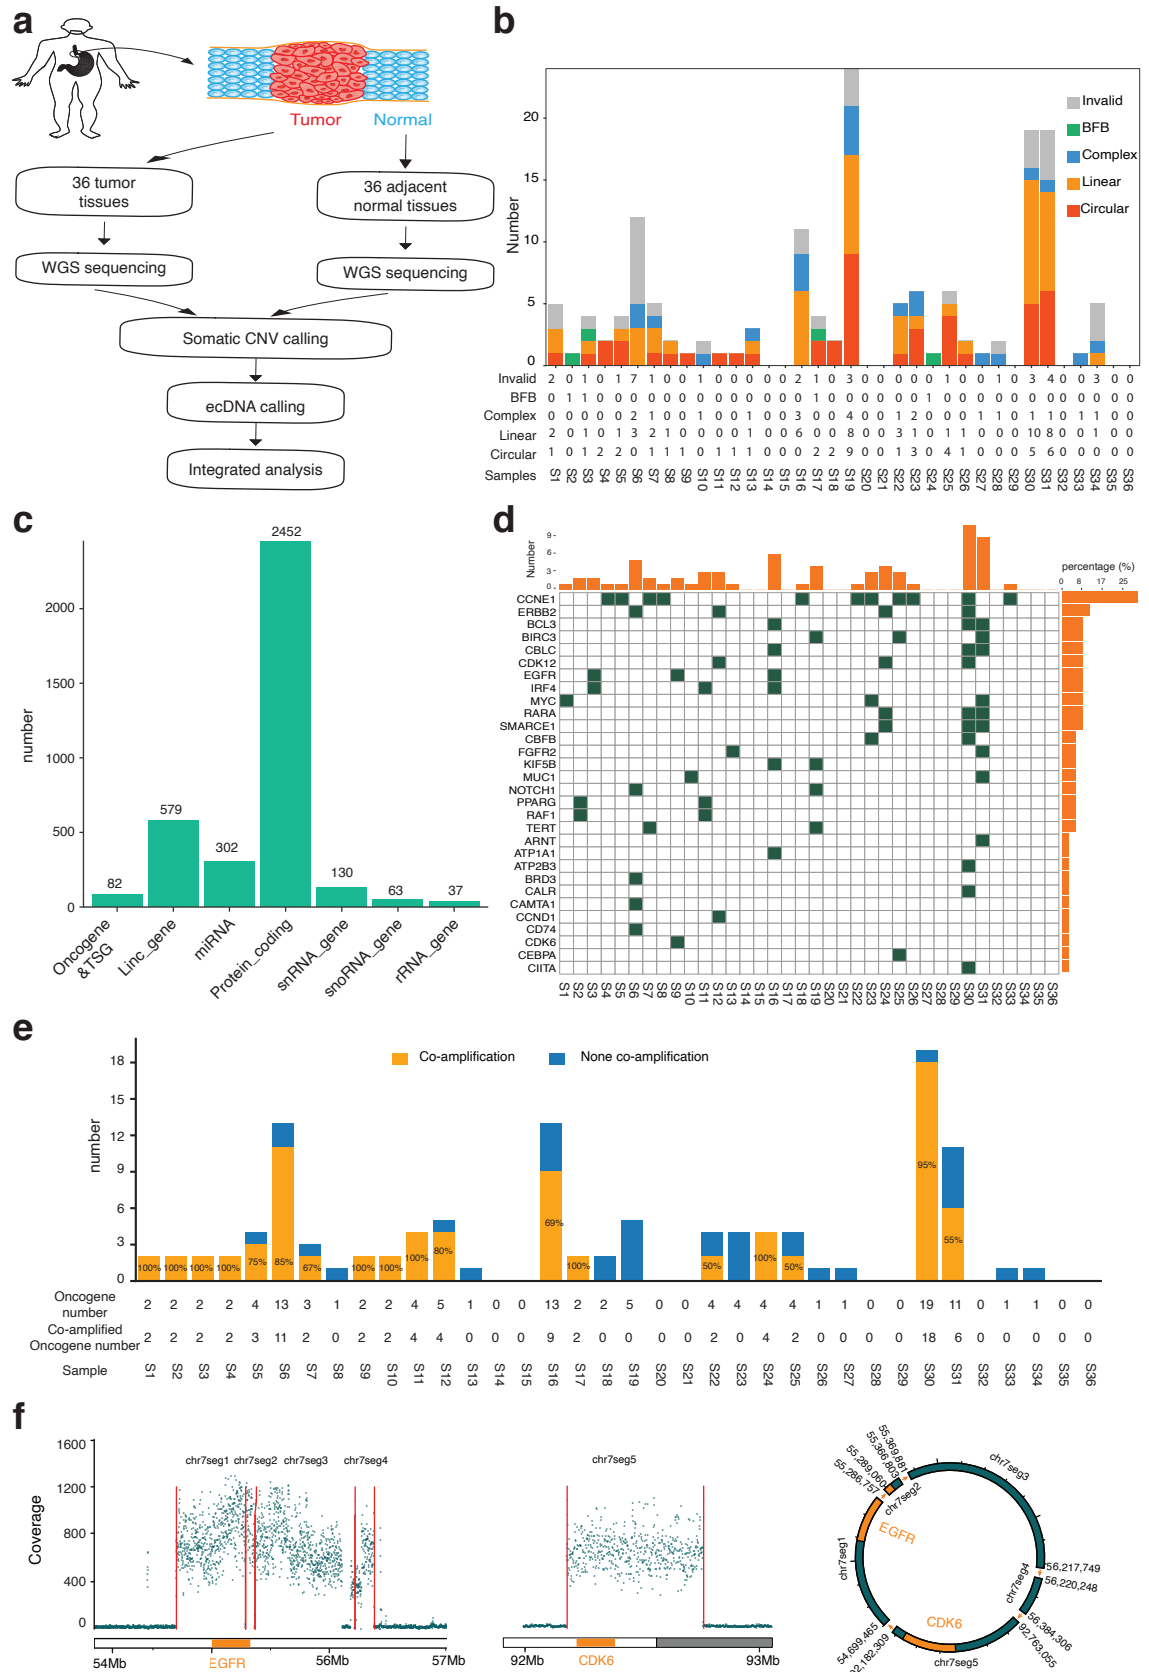

Figure 2

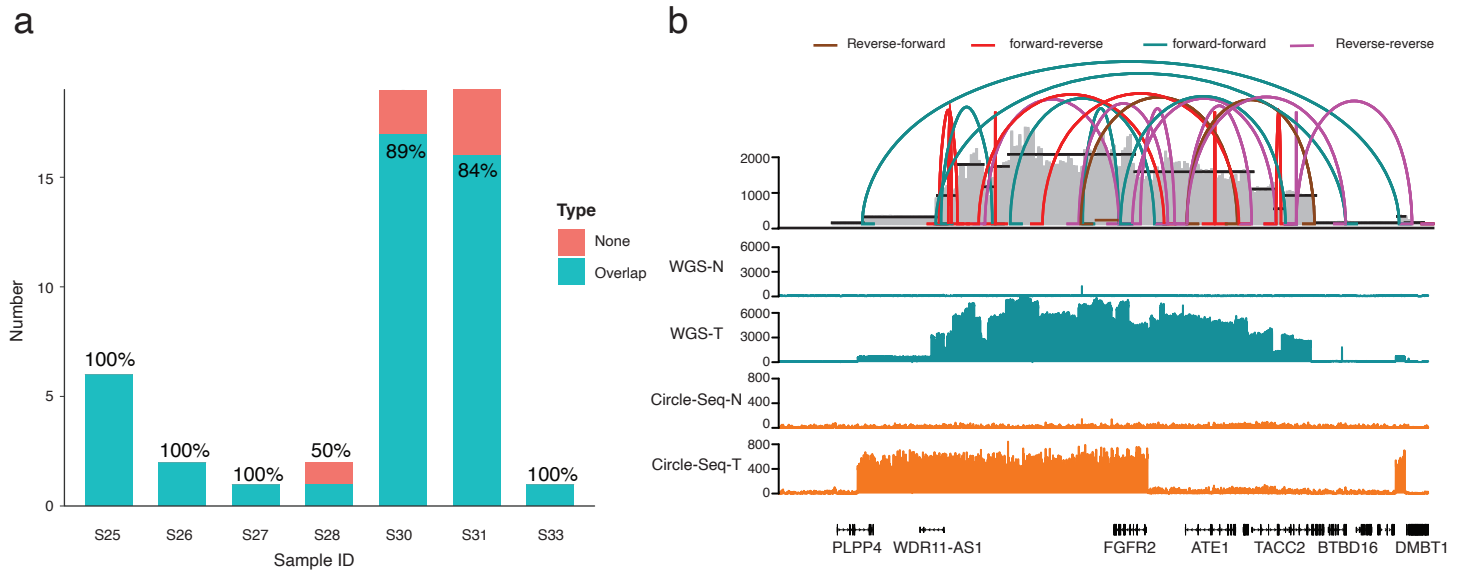



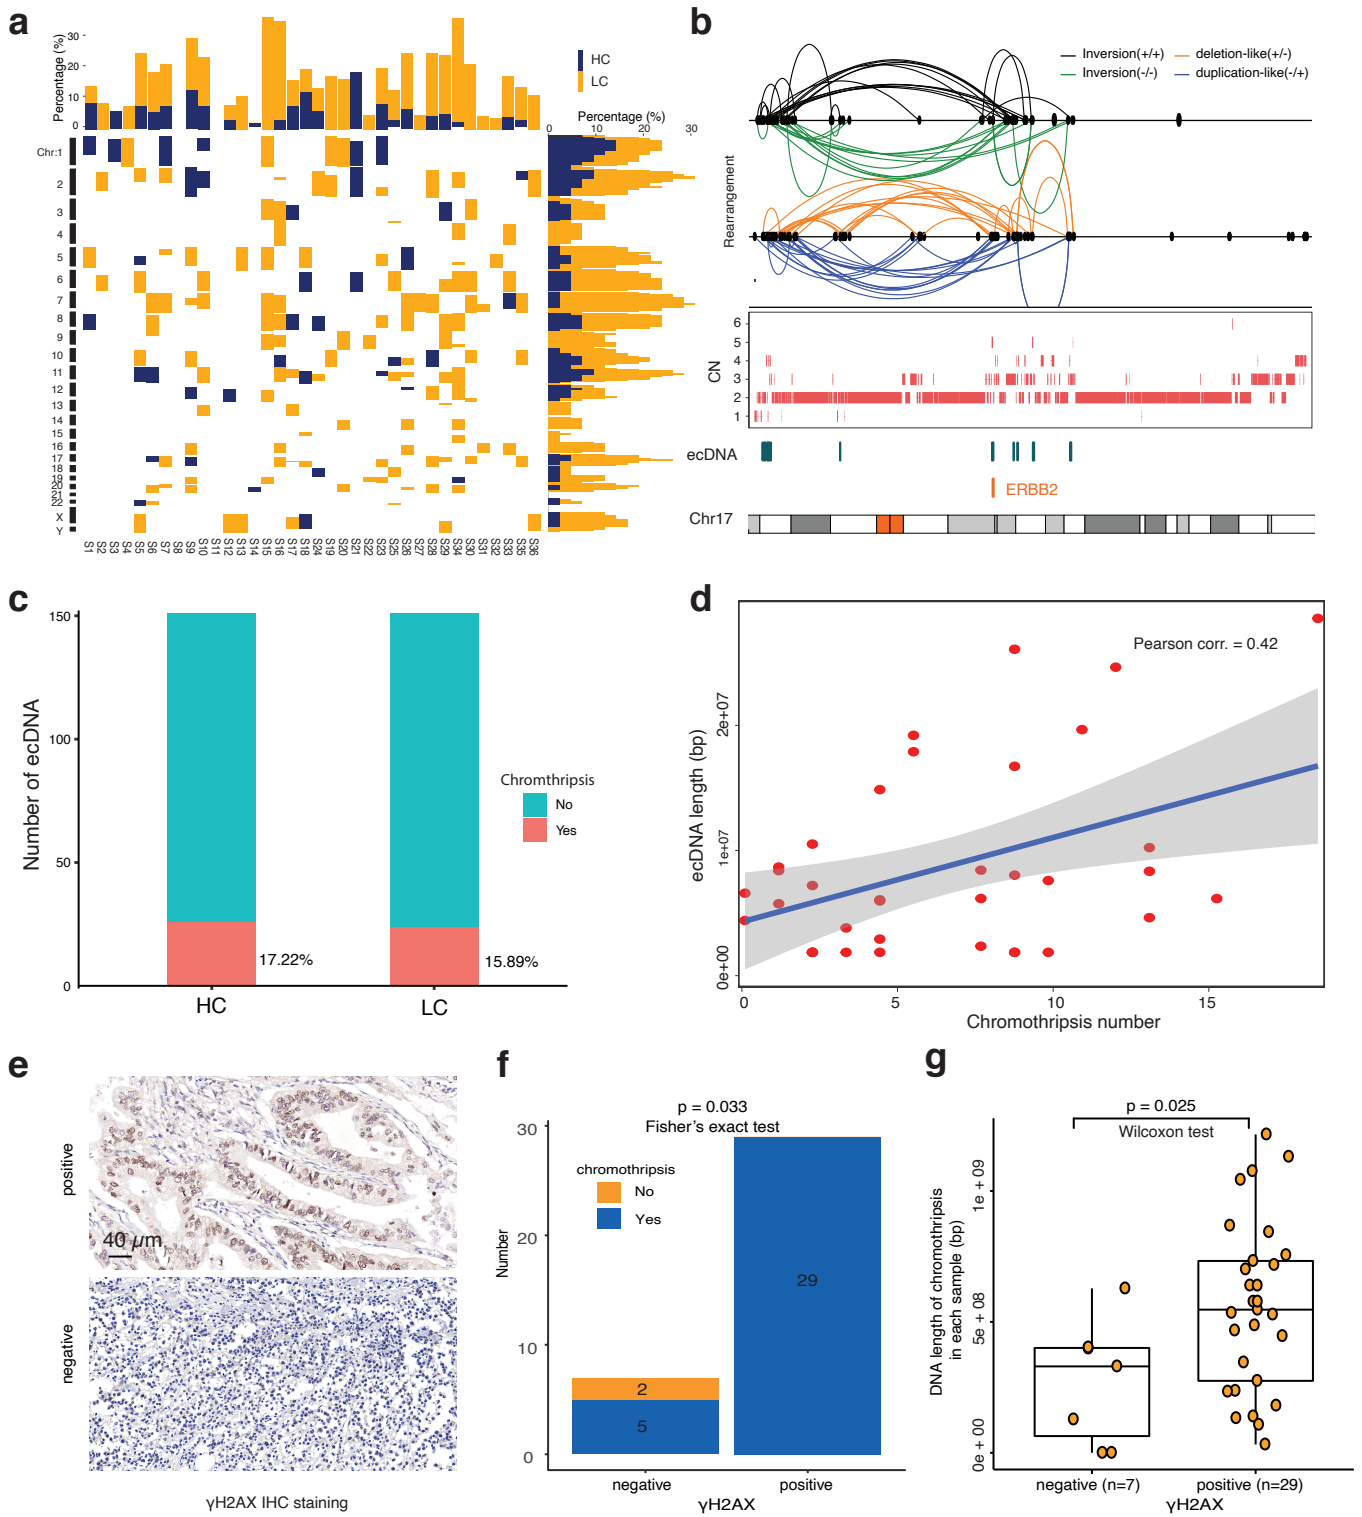

**Figure 4**

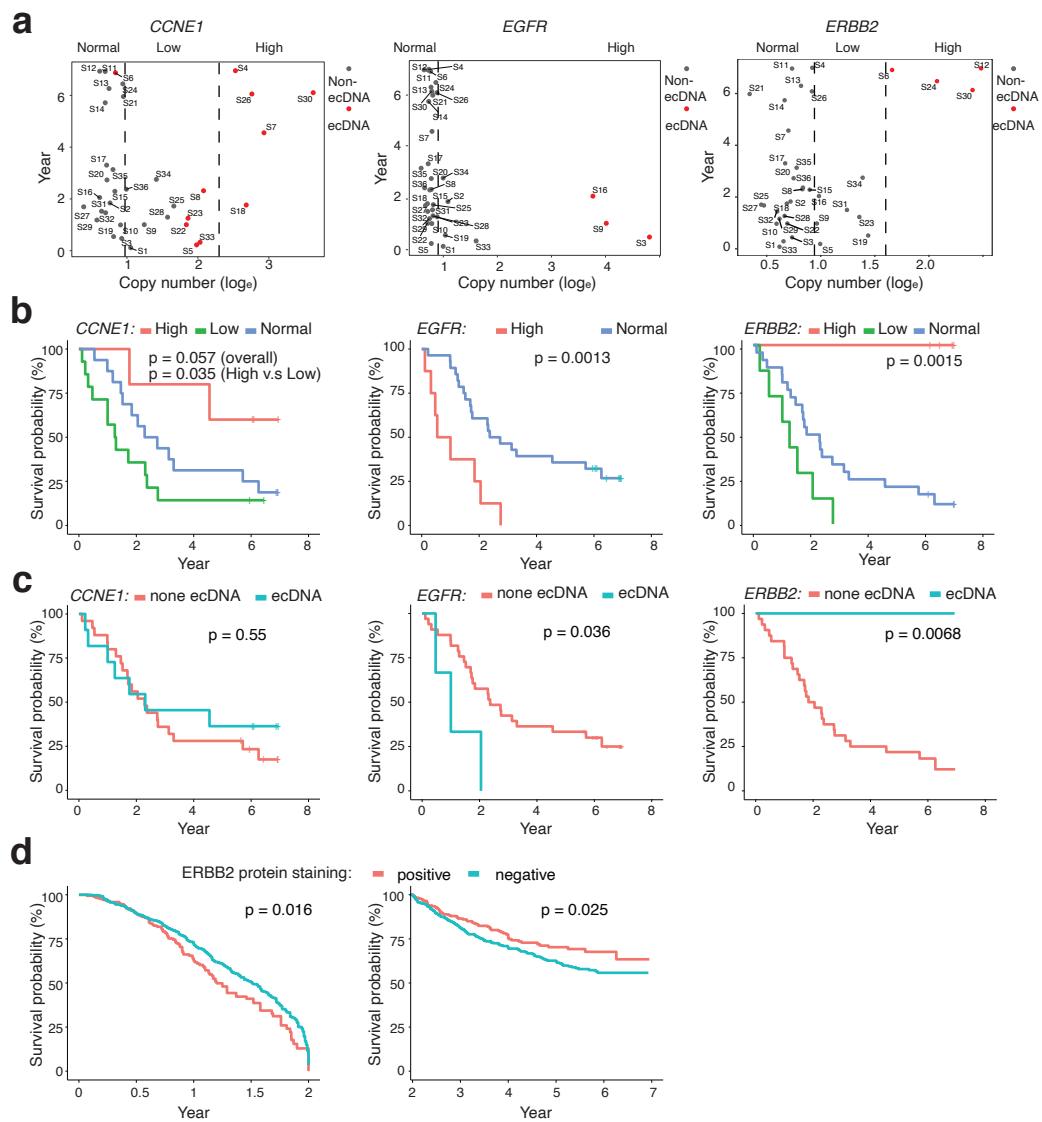

Source: https://www.biorxiv.org/content/biorxiv/early/2021/07/04/2021.07.02.450861.full.pdf
